# Supplementary material for: Altered zinc balance in the Atp7b−/− mouse reveals a mechanism of copper toxicity in Wilson disease
Source: Royal Society of Chemistry journal article supplement (doi:10.1039/c8mt00199e), 2018-01-01
Supplement: c8mt00199e1.pdf [file c8mt00199e1.pdf]

Supp. Data S1

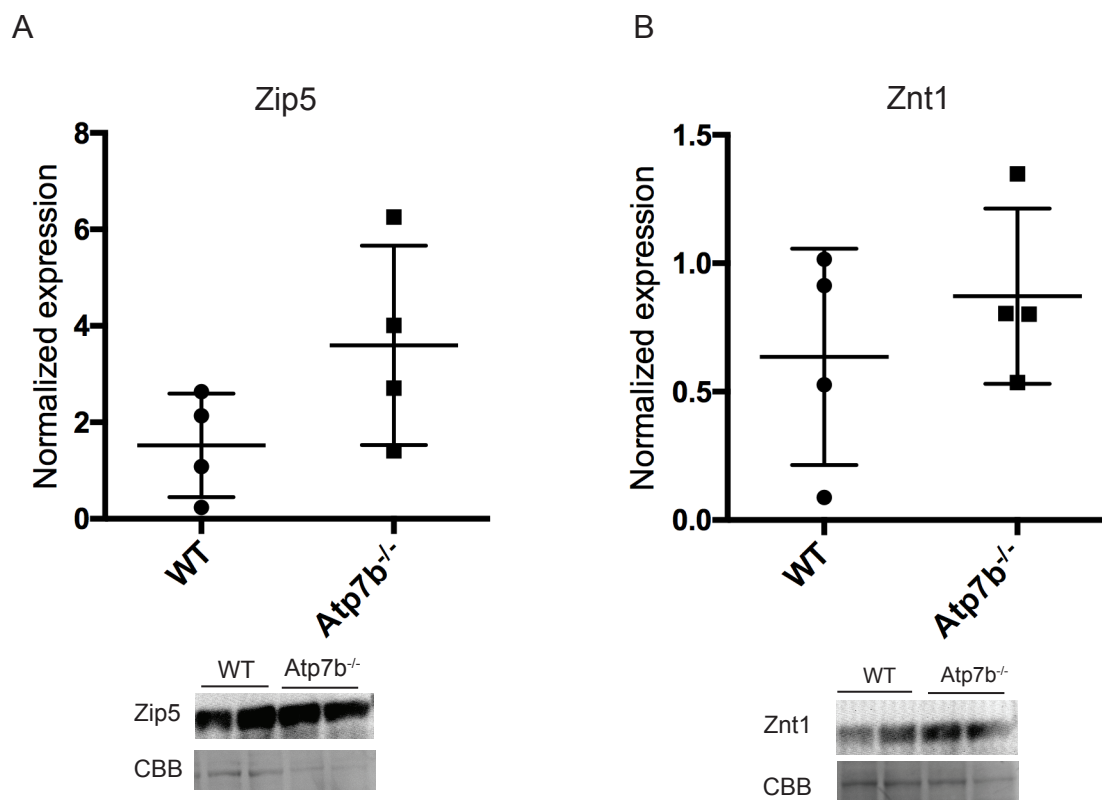

S1. Analysis of Zip5 (A) and Znt1 (B) protein abundance by Western Blot and immunodetection normalized to protein loading by Coomassie Brilliant Blue staining of blot.
