# Supplementary material for: Altered zinc balance in the Atp7b−/− mouse reveals a mechanism of copper toxicity in Wilson disease
Source: Royal Society of Chemistry journal article supplement (doi:10.1039/c8mt00199e), 2018-01-01
Supplement: c8mt00199e2.xlsx [file c8mt00199e2.xlsx]

## Sheet: BURK-258_protein_summary_7
S2: Proteins and peptide counts identified by LC-MS/MS and analyzed by PAW pipeline.
	315											Total	Total	Total	Total	Total	Total	Unique	Unique	Unique	Unique	Unique	Unique	Corrected	Corrected	Corrected	Corrected	Corrected	Corrected		Corrected/norm	Corrected/norm	Corrected/norm	Corrected/norm	Corrected/norm	Corrected/norm
ProtGroup	Counter	Accession	Link	Filter	Coverage	SeqLength	MW	Description	CountsTot	UniqueTot	UniqFrac	217B10	222B10	225B10	66B10	68B10	69B10	217B10	222B10	225B10	66B10	68B10	69B10	217B10	222B10	225B10	66B10	68B10	69B10	OtherLoci	217B10	222B10	225B10	66B10	68B10	69B10
1	1	CONT_005		contaminant	100	50	5561	Promega trypsin artifact 5 K to R mods (2239.1, 2914)(1987, 2003).	19	12	0.632	6	4	2	4	1	2	4	3	1	2	1	1	4.258	3.086	1.071	2.2	1	1.091	CONT_005, CONT_010	6.89369	17.9072	1.03578	2.24337	0.954502	1.0582
2	1	CONT_010		contaminant	39	231	24410	TRYPSIN PRECURSOR [Sus scrofa].	118	111	0.941	29	33	14	20	11	11	27	32	13	18	11	10	28.742	32.914	13.929	19.8	11	10.909	CONT_005, CONT_010	46.5332	190.99	13.471	20.1903	10.4995	10.581
3	1	CONT_016		contaminant	14.2	607	69271	SERUM ALBUMIN PRECURSOR [Bos taurus].	22	8	0.364	3	5	1	6	3	4	1	4	0	2	1	0	1.41	5	0	2.19	1.061	0	CONT_016, CONT_017, P07724	2.28278	29.0135	0	2.23317	1.01273	0
4	1	CONT_017		contaminant	8.5	609	69368	SERUM ALBUMIN PRECURSOR [Homo sapiens].	6	2	0.333	3	1	0	1	1	0	2	0	0	0	0	0	2.667	0	0	0	0	0	CONT_016, CONT_017, P07724	4.31786	0	0	0	0	0
5	1	CONT_046		contaminant	39.4	561	57248	keratin 10, type I, epidermal [Homo sapiens].	147	6	0.041	35	49	16	23	18	6	2	3	1	0	0	0	8.338	12.318	6	0	0	0	CONT_046, CONT_050, CONT_068, CONT_082, CONT_094, CONT_121, CONT_122, P08730	13.4992	71.4778	5.80271	0	0	0
6	1	CONT_049		contaminant	25.1	589	62035	keratin K5, 58K type II, epidermal (version 2) (fragment) [Homo sapiens].	42	1	0.024	12	13	3	5	7	2	0	1	0	0	0	0	2.917	8.164	0.167	1	1.833	0.167	CONT_049, CONT_064, CONT_070, CONT_073, CONT_079, CONT_102, CONT_129, CONT_133, P04104, P11679, Q3TTY5, Q3UV17, Q6IFZ6, Q6IME9, Q6NXH9, Q8BGZ7, Q922U2	4.72261	47.3733	0.161509	1.01971	1.7496	0.161979
7	1	CONT_050		contaminant	8.1	420	45866	keratin 13, type I, cytoskeletal, short form [Homo sapiens].	14	0	0	3	4	1	4	2	0	0	0	0	0	0	0	0	0	0	0	0	0	CONT_046, CONT_050, CONT_082, CONT_094, CONT_121, CONT_122, P08730	0	0	0	0	0	0
7.01	1	CONT_098		redundant	7.4	458	49645	KERATIN, TYPE I CYTOSKELETAL 13 (CYTOKERATIN 13) (K13) (CK 13) [Homo sapiens].	14	0	0	3	4	1	4	2	0	0	0	0	0	0	0	0	0	0	0	0	0	CONT_046, CONT_050, CONT_082, CONT_094, CONT_121, CONT_122, P08730	0	0	0	0	0	0
8	1	CONT_064		contaminant	50.1	645	65912	(S43646) cytokeratin 2, CK 2 [human, epidermis, Peptide, 645 aa].	139	86	0.619	32	47	12	22	17	9	23	28	7	13	11	4	29.248	39.626	10	17.264	13.953	6.282	CONT_049, CONT_064, CONT_070, CONT_073, CONT_079, CONT_088, CONT_089, CONT_102, CONT_129, CONT_133, P04104, P11679, Q3TTY5, Q3UV17, Q6IFZ6, Q6IME9, Q6NXH9, Q8BGZ7, Q922U2	47.3524	229.938	9.67118	17.6044	13.3182	6.09311
8.01	1	CONT_072		redundant	50.1	645	65866	KERATIN, TYPE II CYTOSKELETAL 2 EPIDERMAL (CYTOKERATIN 2E) (K2E) (CK 2E) [Homo sapiens].	139	86	0.619	32	47	12	22	17	9	23	28	7	13	11	4	29.248	39.626	10	17.264	13.953	6.282	CONT_049, CONT_064, CONT_070, CONT_073, CONT_079, CONT_088, CONT_089, CONT_102, CONT_129, CONT_133, P04104, P11679, Q3TTY5, Q3UV17, Q6IFZ6, Q6IME9, Q6NXH9, Q8BGZ7, Q922U2	47.3524	229.938	9.67118	17.6044	13.3182	6.09311
9	1	CONT_068		contaminant	59.2	623	62130	keratin 9, cytoskeletal [Homo sapiens].	202	197	0.975	25	86	20	36	24	11	24	84	20	34	24	11	24.632	85.631	20	35.7	24	11	CONT_046, CONT_068, CONT_082, CONT_094, CONT_121, CONT_122, P08730	39.8791	496.892	19.3424	36.4038	22.908	10.6693
10	1	CONT_070		contaminant	6.9	638	65872	KERATIN, TYPE II CYTOSKELETAL 2 ORAL (CYTOKERATIN 2P) (K2P) (CK 2P) [Homo sapiens].	26	0	0	7	7	2	4	4	2	0	0	0	0	0	0	0.667	0	0.167	0.5	0.5	0.167	CONT_049, CONT_064, CONT_070, CONT_073, CONT_079, CONT_102, CONT_129, CONT_133, P04104, P11679, Q3TTY5, Q3UV17, Q6IFZ6, Q6IME9, Q6NXH9, Q8BGZ7, Q922U2	1.07987	0	0.161509	0.509857	0.477251	0.161979
10.01	1	CONT_118		redundant	7	629	64512	KERATIN, TYPE II CYTOSKELETAL 3 (CYTOKERATIN 3) (K3) (CK3) (65 KD CYTOKERATIN) [Homo sapiens].	26	0	0	7	7	2	4	4	2	0	0	0	0	0	0	0.667	0	0.167	0.5	0.5	0.167	CONT_049, CONT_064, CONT_070, CONT_073, CONT_079, CONT_102, CONT_129, CONT_133, P04104, P11679, Q3TTY5, Q3UV17, Q6IFZ6, Q6IME9, Q6NXH9, Q8BGZ7, Q922U2	1.07987	0	0.161509	0.509857	0.477251	0.161979
10.02	1	CONT_142		redundant	7	629	64449	keratin, 65K type II cytoskeletal [Homo sapiens].	26	0	0	7	7	2	4	4	2	0	0	0	0	0	0	0.667	0	0.167	0.5	0.5	0.167	CONT_049, CONT_064, CONT_070, CONT_073, CONT_079, CONT_102, CONT_129, CONT_133, P04104, P11679, Q3TTY5, Q3UV17, Q6IFZ6, Q6IME9, Q6NXH9, Q8BGZ7, Q922U2	1.07987	0	0.161509	0.509857	0.477251	0.161979
11	1	CONT_073		contaminant	8.5	482	53563	cytokeratin 8 (version 1) [Homo sapiens].	30	1	0.033	3	26	0	0	0	1	0	0	0	0	0	1	0	0	0	0	0	1	CONT_049, CONT_064, CONT_070, CONT_073, CONT_079, CONT_088, CONT_089, CONT_102, CONT_129, CONT_133, P04104, P11679, Q3TTY5, Q3UV17, Q6IFZ6, Q6IME9, Q6NXH9, Q8BGZ7, Q922U2, Q9Z2T6	0	0	0	0	0	0.969932
11.01	1	CONT_103		redundant	8.5	483	53705	Keratin 8 - human [Homo sapiens].	30	1	0.033	3	26	0	0	0	1	0	0	0	0	0	1	0	0	0	0	0	1	CONT_049, CONT_064, CONT_070, CONT_073, CONT_079, CONT_088, CONT_089, CONT_102, CONT_129, CONT_133, P04104, P11679, Q3TTY5, Q3UV17, Q6IFZ6, Q6IME9, Q6NXH9, Q8BGZ7, Q922U2, Q9Z2T6	0	0	0	0	0	0.969932
11.02	1	CONT_124		redundant	8.5	483	53749	cytokeratin 8 (version 2) [Homo sapiens].	30	1	0.033	3	26	0	0	0	1	0	0	0	0	0	1	0	0	0	0	0	1	CONT_049, CONT_064, CONT_070, CONT_073, CONT_079, CONT_088, CONT_089, CONT_102, CONT_129, CONT_133, P04104, P11679, Q3TTY5, Q3UV17, Q6IFZ6, Q6IME9, Q6NXH9, Q8BGZ7, Q922U2, Q9Z2T6	0	0	0	0	0	0.969932
11.03	1	CONT_179		redundant	8.5	483	53675	KERATIN, TYPE II CYTOSKELETAL 8 (CYTOKERATIN 8) (K8) (CK 8) [Homo sapiens].	30	1	0.033	3	26	0	0	0	1	0	0	0	0	0	1	0	0	0	0	0	1	CONT_049, CONT_064, CONT_070, CONT_073, CONT_079, CONT_088, CONT_089, CONT_102, CONT_129, CONT_133, P04104, P11679, Q3TTY5, Q3UV17, Q6IFZ6, Q6IME9, Q6NXH9, Q8BGZ7, Q922U2, Q9Z2T6	0	0	0	0	0	0.969932
12	1	CONT_079		contaminant	24.7	590	62462	KERATIN, TYPE II CYTOSKELETAL 5 (CYTOKERATIN 5) (K5) (CK 5) (58 KD CYTOKERATIN) [Homo sapiens].	46	0	0	10	27	2	2	4	1	0	0	0	0	0	0	2.25	1	0	0.5	1.333	0	CONT_049, CONT_064, CONT_070, CONT_073, CONT_079, CONT_088, CONT_089, CONT_102, CONT_129, CONT_133, P04104, P11679, Q3TTY5, Q3UV17, Q6IFZ6, Q6IME9, Q6NXH9, Q8BGZ7, Q922U2	3.64274	5.80271	0	0.509857	1.27235	0
13	1	CONT_082		contaminant	24.8	472	51664	KERATIN, TYPE I CYTOSKELETAL 14 (CYTOKERATIN 14) (K14) (CK 14) [Homo sapiens].	40	8	0.2	11	15	2	9	2	1	3	4	0	1	0	0	7.758	9.509	0.5	4.383	0	0	CONT_046, CONT_050, CONT_068, CONT_082, CONT_094, CONT_121, CONT_122, P08730	12.5602	55.1779	0.483559	4.46941	0	0
14	1	CONT_088		contaminant	57.5	644	66019	KERATIN, TYPE II CYTOSKELETAL 1 (CYTOKERATIN 1) (K1) (CK 1) (67 KD CYTOKERATIN) (HAIR ALPHA PROTEIN) [Homo sapiens].	348	124	0.356	58	131	34	60	41	24	19	43	13	25	16	8	54.383	124.454	32.376	55.898	37.811	21.631	CONT_064, CONT_073, CONT_079, CONT_088, CONT_089, CONT_102, CONT_129, CONT_133, P04104, P11679, Q3TTY5, Q6IFZ6, Q6NXH9, Q8BGZ7, Q922U2, Q9Z2T6	88.0459	722.17	31.3114	57	36.0907	20.9806
15	1	CONT_089		contaminant	30	493	52790	keratin, 67K type II cytoskeletal (fragment) [Homo sapiens].	201	0	0	35	81	18	31	22	14	0	0	0	0	0	0	0	0.5	0	0	0	0	CONT_064, CONT_073, CONT_079, CONT_088, CONT_089, CONT_102, CONT_129, CONT_133, P04104, P11679, Q3UV17, Q6IFZ6, Q6NXH9, Q922U2, Q9Z2T6	0	2.90135	0	0	0	0
16	1	CONT_094		contaminant	17.1	432	48107	KERATIN, TYPE I CYTOSKELETAL 17 (CYTOKERATIN 17) (K17) (CK 17) (39.1) (VERSION 1) [Homo sapiens].	26	3	0.115	7	7	1	7	3	1	1	0	0	1	1	0	1.919	0	0	2.383	2.25	0	CONT_046, CONT_050, CONT_068, CONT_082, CONT_094, CONT_121, CONT_122, P08730	3.10685	0	0	2.42998	2.14763	0
17	1	CONT_102		contaminant	6.6	408	45508	keratin 4, type II, cytoskeletal (fragment) [Homo sapiens].	12	0	0	1	11	0	0	0	0	0	0	0	0	0	0	0	0	0	0	0	0	CONT_049, CONT_064, CONT_070, CONT_073, CONT_079, CONT_088, CONT_089, CONT_102, CONT_129, CONT_133, P04104, P11679, Q3TTY5, Q3UV17, Q6IFZ6, Q6IME9, Q6NXH9, Q8BGZ7, Q922U2, Q9Z2T6	0	0	0	0	0	0
17.01	1	CONT_119		redundant	5.1	534	57266	KERATIN, TYPE II CYTOSKELETAL 4 (CYTOKERATIN 4) (K4) (CK4) [Homo sapiens].	12	0	0	1	11	0	0	0	0	0	0	0	0	0	0	0	0	0	0	0	0	CONT_049, CONT_064, CONT_070, CONT_073, CONT_079, CONT_088, CONT_089, CONT_102, CONT_129, CONT_133, P04104, P11679, Q3TTY5, Q3UV17, Q6IFZ6, Q6IME9, Q6NXH9, Q8BGZ7, Q922U2, Q9Z2T6	0	0	0	0	0	0
18	1	CONT_121		contaminant	46.2	593	59520	KERATIN, TYPE I CYTOSKELETAL 10 (CYTOKERATIN 10) (K10) (CK 10) [Homo sapiens].	170	29	0.171	41	57	17	27	21	7	8	11	2	4	3	1	33.353	45.165	12	24.533	20.75	7	CONT_046, CONT_050, CONT_068, CONT_082, CONT_094, CONT_121, CONT_122, P08730	53.9984	262.079	11.6054	25.0167	19.8059	6.78952
19	1	CONT_122		contaminant	16.1	473	50803	keratin, type I, K16 [Homo sapiens].	33	1	0.03	8	12	2	8	2	1	0	1	0	0	0	0	0	2.377	0.5	0	0	0	CONT_046, CONT_050, CONT_068, CONT_082, CONT_094, CONT_121, CONT_122, P08730	0	13.793	0.483559	0	0	0
19.01	1	CONT_156		redundant	16.1	473	51239	type I keratin 16 [human, epidermal keratinocytes, Peptide, 473 aa].	33	1	0.03	8	12	2	8	2	1	0	1	0	0	0	0	0	2.377	0.5	0	0	0	CONT_046, CONT_050, CONT_068, CONT_082, CONT_094, CONT_121, CONT_122, P08730	0	13.793	0.483559	0	0	0
19.02	1	CONT_168		redundant	16.1	473	50807	KERATIN, TYPE I CYTOSKELETAL 16 (CYTOKERATIN 16) (K16) (CK 16) [Homo sapiens].	33	1	0.03	8	12	2	8	2	1	0	1	0	0	0	0	0	2.377	0.5	0	0	0	CONT_046, CONT_050, CONT_068, CONT_082, CONT_094, CONT_121, CONT_122, P08730	0	13.793	0.483559	0	0	0
20	1	CONT_129		contaminant	25	564	60046	KERATIN, TYPE II CYTOSKELETAL 6A (CYTOKERATIN 6A) (CK 6A) (K6A KERATIN) [Homo sapiens].	52	0	0	14	24	3	5	4	2	0	0	0	0	0	0	3.25	0	0.167	1	0.5	0.167	CONT_049, CONT_064, CONT_070, CONT_073, CONT_079, CONT_088, CONT_089, CONT_102, CONT_129, CONT_133, P04104, P11679, Q3TTY5, Q3UV17, Q6IFZ6, Q6IME9, Q6NXH9, Q8BGZ7, Q922U2	5.26174	0	0.161509	1.01971	0.477251	0.161979
20.01	1	CONT_131		redundant	25	564	60201	KERATIN, TYPE II CYTOSKELETAL 6C (CYTOKERATIN 6C) (CK 6C) (K6C KERATIN) [Homo sapiens].	52	0	0	14	24	3	5	4	2	0	0	0	0	0	0	3.25	0	0.167	1	0.5	0.167	CONT_049, CONT_064, CONT_070, CONT_073, CONT_079, CONT_088, CONT_089, CONT_102, CONT_129, CONT_133, P04104, P11679, Q3TTY5, Q3UV17, Q6IFZ6, Q6IME9, Q6NXH9, Q8BGZ7, Q922U2	5.26174	0	0.161509	1.01971	0.477251	0.161979
21	1	CONT_133		contaminant	21.3	564	60068	KERATIN, TYPE II CYTOSKELETAL 6F (CYTOKERATIN 6F) (CK 6F) (K6F KERATIN) [Homo sapiens].	69	0	0	16	33	6	6	4	4	0	0	0	0	0	0	1.75	0	0	0.5	0	0	CONT_049, CONT_064, CONT_070, CONT_073, CONT_079, CONT_088, CONT_089, CONT_102, CONT_129, CONT_133, P04104, P11679, Q3TTY5, Q3UV17, Q6IFZ6, Q6IME9, Q6NXH9, Q8BGZ7, Q922U2	2.83324	0	0	0.509857	0	0
22	1	REV_A2AGT5		reversed	1	2032	225636	REVERSED.	6	6	1	1	0	1	2	0	2	1	0	1	2	0	2	1	0	1	2	0	2		1.619	0	0.967118	2.03943	0	1.93986
23	1	REV_A2ASS6		reversed	0.3	35213	3906489	REVERSED.	8	8	1	1	0	1	1	3	2	1	0	1	1	3	2	1	0	1	1	3	2		1.619	0	0.967118	1.01971	2.86351	1.93986
24	1	REV_A2CG63		reversed	1.4	1314	147644	REVERSED.	28	28	1	0	0	7	4	10	7	0	0	7	4	10	7	0	0	7	4	10	7		0	0	6.76983	4.07886	9.54502	6.78952
25	1	REV_A6H584		reversed	0.6	2640	289576	REVERSED.	29	29	1	0	0	2	10	7	10	0	0	2	10	7	10	0	0	2	10	7	10		0	0	1.93424	10.1971	6.68151	9.69932
26	1	REV_Q3UR70		reversed	2.7	860	97304	REVERSED.	12	12	1	2	0	2	5	2	1	2	0	2	5	2	1	2	0	2	5	2	1		3.23799	0	1.93424	5.09857	1.909	0.969932
27	1	REV_Q6A078		reversed	1.5	2472	289078	REVERSED.	4	4	1	1	0	0	0	2	1	1	0	0	0	2	1	1	0	0	0	2	1		1.619	0	0	0	1.909	0.969932
28	1	REV_Q6URW6		reversed	2.1	2000	228587	REVERSED.	10	10	1	2	0	2	3	0	3	2	0	2	3	0	3	2	0	2	3	0	3		3.23799	0	1.93424	3.05914	0	2.9098
29	1	REV_Q8CHG3		reversed	1.5	1679	194446	REVERSED.	2	2	1	2	0	0	0	0	0	2	0	0	0	0	0	2	0	0	0	0	0		3.23799	0	0	0	0	0
30	1	REV_Q9QZR5		reversed	1.9	1196	130499	REVERSED.	3	3	1	0	0	1	2	0	0	0	0	1	2	0	0	0	0	1	2	0	0		0	0	0.967118	2.03943	0	0
31	1	A2BIM8	MUP18_MOUSE		66.9	181	20764	Major urinary protein 18 OS=Mus musculus GN=Mup18 PE=3 SV=1	39	0	0	6	8	20	0	1	4	0	0	0	0	0	0	0	0	0	0	0	0	A2BIM8, B5X0G2, P11589	0	0	0	0	0	0
31.01	1	P02762	MUP6_MOUSE	redundant	67.2	180	20650	Major urinary protein 6 OS=Mus musculus GN=Mup6 PE=1 SV=2	39	0	0	6	8	20	0	1	4	0	0	0	0	0	0	0	0	0	0	0	0	A2BIM8, B5X0G2, P11589	0	0	0	0	0	0
31.02	1	P04938	MUP11_MOUSE	redundant	66.9	181	20764	Major urinary protein 11 OS=Mus musculus GN=Mup11 PE=1 SV=2	39	0	0	6	8	20	0	1	4	0	0	0	0	0	0	0	0	0	0	0	0	A2BIM8, B5X0G2, P11589	0	0	0	0	0	0
32	1	B5X0G2	MUP17_MOUSE		65.6	180	20639	Major urinary protein 17 OS=Mus musculus GN=Mup17 PE=2 SV=2	36	1	0.028	5	8	18	0	1	4	0	0	1	0	0	0	0	0	7.2	0	0	0	A2BIM8, B5X0G2, P11589	0	0	6.96325	0	0	0
33	1	O08583	THOC4_MOUSE		8.2	255	26941	THO complex subunit 4 OS=Mus musculus GN=Alyref PE=1 SV=3	3	3	1	0	0	2	0	1	0	0	0	2	0	1	0	0	0	2	0	1	0		0	0	1.93424	0	0.954502	0
33.01	1	Q9JJW6	ALRF2_MOUSE	redundant	9.6	218	23731	Aly/REF export factor 2 OS=Mus musculus GN=Alyref2 PE=1 SV=1	3	3	1	0	0	2	0	1	0	0	0	2	0	1	0	0	0	2	0	1	0		0	0	1.93424	0	0.954502	0
34	1	O08709	PRDX6_MOUSE		59.4	224	24872	Peroxiredoxin-6 OS=Mus musculus GN=Prdx6 PE=1 SV=3	81	81	1	2	0	13	22	23	21	2	0	13	22	23	21	2	0	13	22	23	21		3.23799	0	12.5725	22.4337	21.9535	20.3686
35	1	O08749	DLDH_MOUSE		7.9	509	54273	Dihydrolipoyl dehydrogenase, mitochondrial OS=Mus musculus GN=Dld PE=1 SV=2	19	19	1	2	0	4	3	6	4	2	0	4	3	6	4	2	0	4	3	6	4		3.23799	0	3.86847	3.05914	5.72701	3.87973
36	1	O08997	ATOX1_MOUSE		58.8	68	7339	Copper transport protein ATOX1 OS=Mus musculus GN=Atox1 PE=1 SV=1	77	77	1	7	0	14	20	18	18	7	0	14	20	18	18	7	0	14	20	18	18		11.333	0	13.5397	20.3943	17.181	17.4588
37	1	O09131	GSTO1_MOUSE		21.2	240	27499	Glutathione S-transferase omega-1 OS=Mus musculus GN=Gsto1 PE=1 SV=2	12	12	1	1	0	4	2	3	2	1	0	4	2	3	2	1	0	4	2	3	2		1.619	0	3.86847	2.03943	2.86351	1.93986
38	1	O09173	HGD_MOUSE		21.1	445	49961	Homogentisate 1,2-dioxygenase OS=Mus musculus GN=Hgd PE=1 SV=2	11	11	1	2	0	5	1	1	2	2	0	5	1	1	2	2	0	5	1	1	2		3.23799	0	4.83559	1.01971	0.954502	1.93986
39	1	O35215	DOPD_MOUSE		71.2	118	13078	D-dopachrome decarboxylase OS=Mus musculus GN=Ddt PE=1 SV=3	54	54	1	10	0	18	5	12	9	10	0	18	5	12	9	10	0	18	5	12	9		16.19	0	17.4081	5.09857	11.454	8.72939
40	1	O35490	BHMT1_MOUSE		47.4	407	45022	Betaine--homocysteine S-methyltransferase 1 OS=Mus musculus GN=Bhmt PE=1 SV=1	40	40	1	1	0	10	15	5	9	1	0	10	15	5	9	1	0	10	15	5	9		1.619	0	9.67118	15.2957	4.77251	8.72939
41	1	O35643	AP1B1_MOUSE		4.6	943	103936	AP-1 complex subunit beta-1 OS=Mus musculus GN=Ap1b1 PE=1 SV=2	3	2	0.667	0	0	0	1	2	0	0	0	0	1	1	0	0	0	0	1	1.5	0	O35643, Q9DBG3	0	0	0	1.01971	1.43175	0
42	1	O35660	GSTM6_MOUSE		21.1	218	25622	Glutathione S-transferase Mu 6 OS=Mus musculus GN=Gstm6 PE=1 SV=4	79	1	0.013	11	0	16	12	19	21	0	0	0	0	0	1	0	0	0	0	0	1.55	O35660, P10649, P15626, P19639, Q80W21	0	0	0	0	0	1.50339
43	1	O35744	CHIL3_MOUSE		8.8	398	44459	Chitinase-like protein 3 OS=Mus musculus GN=Chil3 PE=1 SV=2	4	4	1	0	0	3	0	0	1	0	0	3	0	0	1	0	0	3	0	0	1		0	0	2.90135	0	0	0.969932
44	1	O35945	AL1A7_MOUSE		2	501	54589	Aldehyde dehydrogenase, cytosolic 1 OS=Mus musculus GN=Aldh1a7 PE=1 SV=1	6	6	1	0	0	0	0	3	3	0	0	0	0	3	3	0	0	0	0	3	3		0	0	0	0	2.86351	2.9098
45	1	O55033	NCK2_MOUSE		6.1	380	42880	Cytoplasmic protein NCK2 OS=Mus musculus GN=Nck2 PE=1 SV=1	2	1	0.5	0	0	2	0	0	0	0	0	1	0	0	0	0	0	1.333	0	0	0	O55033, Q99M51	0	0	1.28917	0	0	0
46	1	O55060	TPMT_MOUSE		30.4	240	27587	Thiopurine S-methyltransferase OS=Mus musculus GN=Tpmt PE=1 SV=1	8	8	1	0	0	1	2	3	2	0	0	1	2	3	2	0	0	1	2	3	2		0	0	0.967118	2.03943	2.86351	1.93986
47	1	O55137	ACOT1_MOUSE		6.9	419	46137	Acyl-coenzyme A thioesterase 1 OS=Mus musculus GN=Acot1 PE=1 SV=1	5	1	0.2	0	0	0	2	1	2	0	0	0	0	0	1	0	0	0	1	0	1.5	O55137, Q8BWN8	0	0	0	1.01971	0	1.4549
47.01	1	Q9QYR9	ACOT2_MOUSE	redundant	6.4	453	49658	Acyl-coenzyme A thioesterase 2, mitochondrial OS=Mus musculus GN=Acot2 PE=1 SV=2	5	1	0.2	0	0	0	2	1	2	0	0	0	0	0	1	0	0	0	1	0	1.5	O55137, Q8BWN8	0	0	0	1.01971	0	1.4549
48	1	O70370	CATS_MOUSE		12.9	340	38476	Cathepsin S OS=Mus musculus GN=Ctss PE=1 SV=2	7	7	1	2	0	4	0	0	1	2	0	4	0	0	1	2	0	4	0	0	1		3.23799	0	3.86847	0	0	0.969932
49	1	O70400	PDLI1_MOUSE		7	327	35775	PDZ and LIM domain protein 1 OS=Mus musculus GN=Pdlim1 PE=1 SV=4	3	3	1	0	0	0	2	0	1	0	0	0	2	0	1	0	0	0	2	0	1		0	0	0	2.03943	0	0.969932
50	1	O70439	STX7_MOUSE		16.1	261	29822	Syntaxin-7 OS=Mus musculus GN=Stx7 PE=1 SV=3	11	11	1	0	0	2	3	2	4	0	0	2	3	2	4	0	0	2	3	2	4		0	0	1.93424	3.05914	1.909	3.87973
51	1	O88531	PPT1_MOUSE		10.8	306	34491	Palmitoyl-protein thioesterase 1 OS=Mus musculus GN=Ppt1 PE=1 SV=2	2	2	1	0	0	2	0	0	0	0	0	2	0	0	0	0	0	2	0	0	0		0	0	1.93424	0	0	0
52	1	O88569	ROA2_MOUSE		23.2	353	37404	Heterogeneous nuclear ribonucleoproteins A2/B1 OS=Mus musculus GN=Hnrnpa2b1 PE=1 SV=2	46	46	1	0	0	7	15	13	11	0	0	7	15	13	11	0	0	7	15	13	11		0	0	6.76983	15.2957	12.4085	10.6693
53	1	O88844	IDHC_MOUSE		15.7	414	46675	Isocitrate dehydrogenase [NADP] cytoplasmic OS=Mus musculus GN=Idh1 PE=1 SV=2	14	13	0.929	0	0	12	0	1	1	0	0	11	0	1	1	0	0	11.917	0	1	1	O88844, P54071	0	0	11.5251	0	0.954502	0.969932
54	1	O88851	RBBP9_MOUSE		22.6	186	20913	Putative hydrolase RBBP9 OS=Mus musculus GN=Rbbp9 PE=1 SV=2	11	11	1	0	0	4	2	3	2	0	0	4	2	3	2	0	0	4	2	3	2		0	0	3.86847	2.03943	2.86351	1.93986
55	1	P00329	ADH1_MOUSE		22.1	375	39772	Alcohol dehydrogenase 1 OS=Mus musculus GN=Adh1 PE=1 SV=2	20	20	1	2	0	2	4	4	8	2	0	2	4	4	8	2	0	2	4	4	8		3.23799	0	1.93424	4.07886	3.81801	7.75946
56	1	P00375	DYR_MOUSE		19.3	187	21607	Dihydrofolate reductase OS=Mus musculus GN=Dhfr PE=1 SV=3	11	11	1	2	0	1	3	2	3	2	0	1	3	2	3	2	0	1	3	2	3		3.23799	0	0.967118	3.05914	1.909	2.9098
57	1	P00687	AMY1_MOUSE		16.6	511	57645	Alpha-amylase 1 OS=Mus musculus GN=Amy1 PE=1 SV=2	11	6	0.545	5	0	0	2	3	1	0	0	0	2	3	1	0	0	0	2	3	1	P00687, P00688	0	0	0	2.03943	2.86351	0.969932
58	1	P00688	AMYP_MOUSE		29.3	508	57319	Pancreatic alpha-amylase OS=Mus musculus GN=Amy2 PE=1 SV=2	15	10	0.667	15	0	0	0	0	0	10	0	0	0	0	0	15	0	0	0	0	0	P00687, P00688	24.2849	0	0	0	0	0
59	1	P00920	CAH2_MOUSE		62.7	260	29034	Carbonic anhydrase 2 OS=Mus musculus GN=Ca2 PE=1 SV=4	115	115	1	11	0	8	32	27	37	11	0	8	32	27	37	11	0	8	32	27	37		17.809	0	7.73694	32.6309	25.7716	35.8875
60	1	P01942	HBA_MOUSE		69	142	15086	Hemoglobin subunit alpha OS=Mus musculus GN=Hba PE=1 SV=2	1229	1229	1	72	30	97	316	309	405	72	30	97	316	309	405	72	30	97	316	309	405		116.568	174.081	93.8104	322.23	294.941	392.823
61	1	P02088	HBB1_MOUSE		89.8	147	15841	Hemoglobin subunit beta-1 OS=Mus musculus GN=Hbb-b1 PE=1 SV=2	1030	556	0.54	50	17	95	261	273	334	21	8	43	143	154	187	45.36	15.2	93.818	253.795	243.719	291.581	P02088, P02089, P02104	73.4377	88.2012	90.7331	258.798	232.63	282.814
62	1	P02089	HBB2_MOUSE		91.2	147	15879	Hemoglobin subunit beta-2 OS=Mus musculus GN=Hbb-b2 PE=1 SV=2	612	138	0.225	33	11	53	126	168	221	4	2	1	8	49	74	8.64	3.8	2.182	14.198	77.547	115.385	P02088, P02089, P02104	13.9881	22.0503	2.11025	14.4779	74.0188	111.916
63	1	P02104	HBE_MOUSE		21.1	147	16138	Hemoglobin subunit epsilon-Y2 OS=Mus musculus GN=Hbb-y PE=1 SV=2	174	14	0.08	15	4	18	43	42	52	0	0	0	4	4	6	0	0	0	5.006	4.734	7.034	P02088, P02089, P02104	0	0	0	5.10469	4.51861	6.8225
64	1	P02798	MT2_MOUSE		34.4	61	6116	Metallothionein-2 OS=Mus musculus GN=Mt2 PE=1 SV=2	61	61	1	0	0	1	18	19	23	0	0	1	18	19	23	0	0	1	18	19	23		0	0	0.967118	18.3549	18.1355	22.3084
65	1	P02802	MT1_MOUSE		34.4	61	6019	Metallothionein-1 OS=Mus musculus GN=Mt1 PE=1 SV=1	119	119	1	0	0	5	34	40	40	0	0	5	34	40	40	0	0	5	34	40	40		0	0	4.83559	34.6703	38.1801	38.7973
66	1	P04104	K2C1_MOUSE		5.7	637	65607	Keratin, type II cytoskeletal 1 OS=Mus musculus GN=Krt1 PE=1 SV=4	78	18	0.231	10	27	7	18	10	6	1	9	1	4	2	1	1.37	11.755	1.357	5.76	2.762	1.487	CONT_049, CONT_064, CONT_070, CONT_073, CONT_079, CONT_088, CONT_089, CONT_102, CONT_129, CONT_133, P04104, P11679, Q3TTY5, Q3UV17, Q6IFZ6, Q6IME9, Q6NXH9, Q8BGZ7, Q922U2	2.21802	68.2108	1.31238	5.87356	2.63633	1.44229
67	1	P04117	FABP4_MOUSE		37.9	132	14651	Fatty acid-binding protein, adipocyte OS=Mus musculus GN=Fabp4 PE=1 SV=3	29	29	1	2	0	8	11	6	2	2	0	8	11	6	2	2	0	8	11	6	2		3.23799	0	7.73694	11.2169	5.72701	1.93986
68	1	P04186	CFAB_MOUSE		3	761	85005	Complement factor B OS=Mus musculus GN=Cfb PE=1 SV=2	2	2	1	0	0	0	2	0	0	0	0	0	2	0	0	0	0	0	2	0	0		0	0	0	2.03943	0	0
69	1	P04247	MYG_MOUSE		56.5	154	17071	Myoglobin OS=Mus musculus GN=Mb PE=1 SV=3	79	79	1	73	1	2	1	2	0	73	1	2	1	2	0	73	1	2	1	2	0		118.187	5.80271	1.93424	1.01971	1.909	0
70	1	P04939	MUP3_MOUSE		20.7	184	21466	Major urinary protein 3 OS=Mus musculus GN=Mup3 PE=1 SV=1	7	2	0.286	2	1	4	0	0	0	0	0	2	0	0	0	0	0	3.067	0	0	0	P04939, P11589, Q5FW60	0	0	2.96615	0	0	0
71	1	P05201	AATC_MOUSE		35.6	413	46249	Aspartate aminotransferase, cytoplasmic OS=Mus musculus GN=Got1 PE=1 SV=3	45	45	1	12	0	9	7	9	8	12	0	9	7	9	8	12	0	9	7	9	8		19.428	0	8.70406	7.138	8.59052	7.75946
72	1	P05202	AATM_MOUSE		66.7	430	47412	Aspartate aminotransferase, mitochondrial OS=Mus musculus GN=Got2 PE=1 SV=1	349	349	1	67	2	87	64	64	65	67	2	87	64	64	65	67	2	87	64	64	65		108.473	11.6054	84.1393	65.2617	61.0881	63.0456
73	1	P06151	LDHA_MOUSE		20.5	332	36500	L-lactate dehydrogenase A chain OS=Mus musculus GN=Ldha PE=1 SV=3	12	12	1	0	0	10	1	0	1	0	0	10	1	0	1	0	0	10	1	0	1		0	0	9.67118	1.01971	0	0.969932
74	1	P06745	G6PI_MOUSE		16.7	558	62768	Glucose-6-phosphate isomerase OS=Mus musculus GN=Gpi PE=1 SV=4	16	16	1	5	0	5	2	3	1	5	0	5	2	3	1	5	0	5	2	3	1		8.09498	0	4.83559	2.03943	2.86351	0.969932
75	1	P07146	TRY2_MOUSE		12.2	246	26205	Anionic trypsin-2 OS=Mus musculus GN=Prss2 PE=1 SV=1	5	5	1	5	0	0	0	0	0	5	0	0	0	0	0	5	0	0	0	0	0		8.09498	0	0	0	0	0
76	1	P07310	KCRM_MOUSE		13.9	381	43046	Creatine kinase M-type OS=Mus musculus GN=Ckm PE=1 SV=1	5	5	1	5	0	0	0	0	0	5	0	0	0	0	0	5	0	0	0	0	0		8.09498	0	0	0	0	0
77	1	P07724	ALBU_MOUSE		39.3	608	68694	Serum albumin OS=Mus musculus GN=Alb PE=1 SV=3	147	133	0.905	13	0	20	45	35	34	12	0	19	40	32	30	12.923	0	20	44.81	34.939	34	CONT_016, CONT_017, P07724	20.9223	0	19.3424	45.6934	33.3493	32.9777
78	1	P08228	SODC_MOUSE		56.5	154	15944	Superoxide dismutase [Cu-Zn] OS=Mus musculus GN=Sod1 PE=1 SV=2	216	216	1	46	28	48	31	34	29	46	28	48	31	34	29	46	28	48	31	34	29		74.4738	162.476	46.4217	31.6111	32.4531	28.128
79	1	P08249	MDHM_MOUSE		61.5	338	35612	Malate dehydrogenase, mitochondrial OS=Mus musculus GN=Mdh2 PE=1 SV=3	146	146	1	9	0	32	43	32	30	9	0	32	43	32	30	9	0	32	43	32	30		14.571	0	30.9478	43.8477	30.5441	29.098
80	1	P08730	K1C13_MOUSE		8.2	437	47755	Keratin, type I cytoskeletal 13 OS=Mus musculus GN=Krt13 PE=1 SV=2	25	0	0	5	7	2	7	3	1	0	0	0	0	0	0	0	0	0	0	0	0	CONT_046, CONT_050, CONT_068, CONT_082, CONT_094, CONT_121, CONT_122, P08730	0	0	0	0	0	0
81	1	P09411	PGK1_MOUSE		25.7	417	44551	Phosphoglycerate kinase 1 OS=Mus musculus GN=Pgk1 PE=1 SV=4	19	19	1	1	0	9	4	2	3	1	0	9	4	2	3	1	0	9	4	2	3		1.619	0	8.70406	4.07886	1.909	2.9098
82	1	P09671	SODM_MOUSE		32	222	24604	Superoxide dismutase [Mn], mitochondrial OS=Mus musculus GN=Sod2 PE=1 SV=3	33	33	1	0	0	9	6	8	10	0	0	9	6	8	10	0	0	9	6	8	10		0	0	8.70406	6.11829	7.63602	9.69932
83	1	P09813	APOA2_MOUSE		18.6	102	11310	Apolipoprotein A-II OS=Mus musculus GN=Apoa2 PE=1 SV=2	6	6	1	0	0	1	1	3	1	0	0	1	1	3	1	0	0	1	1	3	1		0	0	0.967118	1.01971	2.86351	0.969932
84	1	P0CG49	UBB_MOUSE		61.6	305	34370	Polyubiquitin-B OS=Mus musculus GN=Ubb PE=2 SV=1	52	52	1	9	0	11	14	7	11	9	0	11	14	7	11	9	0	11	14	7	11		14.571	0	10.6383	14.276	6.68151	10.6693
84.01	1	P0CG50	UBC_MOUSE	redundant	57.6	734	82551	Polyubiquitin-C OS=Mus musculus GN=Ubc PE=1 SV=2	52	52	1	9	0	11	14	7	11	9	0	11	14	7	11	9	0	11	14	7	11		14.571	0	10.6383	14.276	6.68151	10.6693
84.02	1	P62983	RS27A_MOUSE	redundant	30.1	156	17952	Ubiquitin-40S ribosomal protein S27a OS=Mus musculus GN=Rps27a PE=1 SV=2	52	52	1	9	0	11	14	7	11	9	0	11	14	7	11	9	0	11	14	7	11		14.571	0	10.6383	14.276	6.68151	10.6693
84.03	1	P62984	RL40_MOUSE	redundant	36.7	128	14729	Ubiquitin-60S ribosomal protein L40 OS=Mus musculus GN=Uba52 PE=1 SV=2	52	52	1	9	0	11	14	7	11	9	0	11	14	7	11	9	0	11	14	7	11		14.571	0	10.6383	14.276	6.68151	10.6693
85	1	P10126	EF1A1_MOUSE		13.4	462	50115	Elongation factor 1-alpha 1 OS=Mus musculus GN=Eef1a1 PE=1 SV=3	37	37	1	2	1	7	9	10	8	2	1	7	9	10	8	2	1	7	9	10	8		3.23799	5.80271	6.76983	9.17743	9.54502	7.75946
86	1	P10605	CATB_MOUSE		26.3	339	37281	Cathepsin B OS=Mus musculus GN=Ctsb PE=1 SV=2	54	54	1	12	1	15	10	8	8	12	1	15	10	8	8	12	1	15	10	8	8		19.428	5.80271	14.5068	10.1971	7.63602	7.75946
87	1	P10639	THIO_MOUSE		80	105	11676	Thioredoxin OS=Mus musculus GN=Txn PE=1 SV=3	103	103	1	8	0	27	20	27	21	8	0	27	20	27	21	8	0	27	20	27	21		12.952	0	26.1122	20.3943	25.7716	20.3686
88	1	P10649	GSTM1_MOUSE		74.3	218	25971	Glutathione S-transferase Mu 1 OS=Mus musculus GN=Gstm1 PE=1 SV=2	724	545	0.753	115	4	149	125	175	156	93	4	118	83	133	114	113.169	4	146.292	120.375	170.793	151.007	O35660, P10649, P15626, P19639, Q80W21	183.22	23.2108	141.482	122.748	163.022	146.467
89	1	P11352	GPX1_MOUSE		12.9	201	22348	Glutathione peroxidase 1 OS=Mus musculus GN=Gpx1 PE=1 SV=2	6	6	1	1	0	0	3	1	1	1	0	0	3	1	1	1	0	0	3	1	1		1.619	0	0	3.05914	0.954502	0.969932
90	1	P11404	FABPH_MOUSE		65.4	133	14820	Fatty acid-binding protein, heart OS=Mus musculus GN=Fabp3 PE=1 SV=5	18	18	1	15	0	2	1	0	0	15	0	2	1	0	0	15	0	2	1	0	0		24.2849	0	1.93424	1.01971	0	0
91	1	P11589	MUP2_MOUSE		64.4	180	20665	Major urinary protein 2 OS=Mus musculus GN=Mup2 PE=1 SV=1	49	9	0.184	10	10	21	0	2	6	2	2	2	0	1	2	10	10	15.4	0	2	6	A2BIM8, B5X0G2, P04939, P11589	16.19	58.0271	14.8936	0	1.909	5.81959
92	1	P11679	K2C8_MOUSE		7.1	490	54566	Keratin, type II cytoskeletal 8 OS=Mus musculus GN=Krt8 PE=1 SV=4	44	8	0.182	5	21	4	3	6	5	0	0	2	1	3	2	0	0	2.267	1.077	3.474	2.6	CONT_049, CONT_064, CONT_070, CONT_073, CONT_079, CONT_088, CONT_089, CONT_102, CONT_129, CONT_133, P04104, P11679, Q3TTY5, Q3UV17, Q6IFZ6, Q6IME9, Q6NXH9, Q8BGZ7, Q922U2	0	0	2.19246	1.09823	3.31594	2.52182
93	1	P11725	OTC_MOUSE		14.1	354	39766	Ornithine carbamoyltransferase, mitochondrial OS=Mus musculus GN=Otc PE=1 SV=1	5	5	1	0	0	0	3	2	0	0	0	0	3	2	0	0	0	0	3	2	0		0	0	0	3.05914	1.909	0
94	1	P12710	FABPL_MOUSE		80.3	127	14247	Fatty acid-binding protein, liver OS=Mus musculus GN=Fabp1 PE=1 SV=2	484	484	1	80	2	118	84	114	86	80	2	118	84	114	86	80	2	118	84	114	86		129.52	11.6054	114.12	85.656	108.813	83.4142
95	1	P13634	CAH1_MOUSE		42.1	261	28332	Carbonic anhydrase 1 OS=Mus musculus GN=Ca1 PE=1 SV=4	48	48	1	1	0	3	15	11	18	1	0	3	15	11	18	1	0	3	15	11	18		1.619	0	2.90135	15.2957	10.4995	17.4588
96	1	P13745	GSTA1_MOUSE		26.5	223	25609	Glutathione S-transferase A1 OS=Mus musculus GN=Gsta1 PE=1 SV=2	141	25	0.177	24	3	27	28	30	29	0	0	0	7	10	8	0	1.5	0	10.744	15.202	12.098	P13745, P24472, P30115	0	8.70406	0	10.9558	14.5103	11.7342
97	1	P14152	MDHC_MOUSE		29.3	334	36512	Malate dehydrogenase, cytoplasmic OS=Mus musculus GN=Mdh1 PE=1 SV=3	40	40	1	5	0	12	7	8	8	5	0	12	7	8	8	5	0	12	7	8	8		8.09498	0	11.6054	7.138	7.63602	7.75946
98	1	P15626	GSTM2_MOUSE		65.6	218	25718	Glutathione S-transferase Mu 2 OS=Mus musculus GN=Gstm2 PE=1 SV=2	181	49	0.271	30	0	37	34	40	40	12	0	12	7	10	8	18.58	0	19.56	11.21	16.301	13.415	O35660, P10649, P15626, P19639, Q80W21	30.0809	0	18.9168	11.431	15.5593	13.0116
99	1	P16015	CAH3_MOUSE		76.5	260	29367	Carbonic anhydrase 3 OS=Mus musculus GN=Ca3 PE=1 SV=3	459	459	1	114	5	114	71	81	74	114	5	114	71	81	74	114	5	114	71	81	74		184.566	29.0135	110.251	72.3997	77.3147	71.775
100	1	P16460	ASSY_MOUSE		6.6	412	46585	Argininosuccinate synthase OS=Mus musculus GN=Ass1 PE=1 SV=1	13	13	1	0	0	3	3	5	2	0	0	3	3	5	2	0	0	3	3	5	2		0	0	2.90135	3.05914	4.77251	1.93986
101	1	P16858	G3P_MOUSE		20.1	333	35811	Glyceraldehyde-3-phosphate dehydrogenase OS=Mus musculus GN=Gapdh PE=1 SV=2	29	29	1	10	0	4	4	6	5	10	0	4	4	6	5	10	0	4	4	6	5		16.19	0	3.86847	4.07886	5.72701	4.84966
102	1	P17182	ENOA_MOUSE		24.7	434	47142	Alpha-enolase OS=Mus musculus GN=Eno1 PE=1 SV=3	29	29	1	2	0	13	3	6	5	2	0	13	3	6	5	2	0	13	3	6	5		3.23799	0	12.5725	3.05914	5.72701	4.84966
103	1	P17225	PTBP1_MOUSE		7.6	527	56479	Polypyrimidine tract-binding protein 1 OS=Mus musculus GN=Ptbp1 PE=1 SV=2	10	10	1	0	0	2	2	3	3	0	0	2	2	3	3	0	0	2	2	3	3		0	0	1.93424	2.03943	2.86351	2.9098
104	1	P17563	SBP1_MOUSE		79.4	472	52515	Selenium-binding protein 1 OS=Mus musculus GN=Selenbp1 PE=1 SV=2	275	45	0.164	40	2	110	44	40	39	10	0	12	8	8	7	31.429	1	45.6	40	36.444	39	P17563, Q63836	50.8834	5.80271	44.1006	40.7886	34.7859	37.8274
105	1	P17742	PPIA_MOUSE		59.8	164	17972	Peptidyl-prolyl cis-trans isomerase A OS=Mus musculus GN=Ppia PE=1 SV=2	326	326	1	57	0	94	53	66	56	57	0	94	53	66	56	57	0	94	53	66	56		92.2828	0	90.9091	54.0449	62.9971	54.3162
106	1	P17751	TPIS_MOUSE		46.5	299	32193	Triosephosphate isomerase OS=Mus musculus GN=Tpi1 PE=1 SV=4	67	67	1	19	0	21	10	10	7	19	0	21	10	10	7	19	0	21	10	10	7		30.7609	0	20.3095	10.1971	9.54502	6.78952
107	1	P18242	CATD_MOUSE		21.7	410	44955	Cathepsin D OS=Mus musculus GN=Ctsd PE=1 SV=1	17	17	1	2	0	5	4	2	4	2	0	5	4	2	4	2	0	5	4	2	4		3.23799	0	4.83559	4.07886	1.909	3.87973
108	1	P18760	COF1_MOUSE		53	166	18561	Cofilin-1 OS=Mus musculus GN=Cfl1 PE=1 SV=3	52	45	0.865	3	0	18	14	6	11	3	0	16	12	5	9	3	0	17.778	13.714	5.5	10.385	P18760, P45591	4.85699	0	17.1934	13.9844	5.24976	10.0727
109	1	P19157	GSTP1_MOUSE		69.5	210	23610	Glutathione S-transferase P 1 OS=Mus musculus GN=Gstp1 PE=1 SV=2	235	235	1	8	1	125	31	33	37	8	1	125	31	33	37	8	1	125	31	33	37		12.952	5.80271	120.89	31.6111	31.4986	35.8875
110	1	P19639	GSTM4_MOUSE		67.9	218	25703	Glutathione S-transferase Mu 3 OS=Mus musculus GN=Gstm3 PE=1 SV=2	215	43	0.2	24	0	36	43	55	57	2	0	5	9	12	15	3.072	0	7.776	15.852	20.628	26.333	O35660, P10649, P15626, P19639, Q80W21	4.97356	0	7.52031	16.1645	19.6895	25.5412
111	1	P20029	GRP78_MOUSE		4.7	655	72423	78 kDa glucose-regulated protein OS=Mus musculus GN=Hspa5 PE=1 SV=3	5	1	0.2	0	0	1	2	1	1	0	0	0	1	0	0	0	0	0	1.2	0	0	P20029, P63017	0	0	0	1.22366	0	0
112	1	P23589	CAH5A_MOUSE		16.7	299	34074	Carbonic anhydrase 5A, mitochondrial OS=Mus musculus GN=Ca5a PE=1 SV=2	20	20	1	0	0	3	7	5	5	0	0	3	7	5	5	0	0	3	7	5	5		0	0	2.90135	7.138	4.77251	4.84966
113	1	P24270	CATA_MOUSE		21.1	527	59796	Catalase OS=Mus musculus GN=Cat PE=1 SV=4	23	23	1	3	0	5	6	6	3	3	0	5	6	6	3	3	0	5	6	6	3		4.85699	0	4.83559	6.11829	5.72701	2.9098
114	1	P24472	GSTA4_MOUSE		19.4	222	25565	Glutathione S-transferase A4 OS=Mus musculus GN=Gsta4 PE=1 SV=3	23	9	0.391	3	0	4	5	7	4	0	0	1	3	5	0	0	0	1.071	3.143	5.233	0	P13745, P24472, P30115	0	0	1.03578	3.20496	4.99491	0
115	1	P24527	LKHA4_MOUSE		8.3	611	69052	Leukotriene A-4 hydrolase OS=Mus musculus GN=Lta4h PE=1 SV=4	5	5	1	2	0	3	0	0	0	2	0	3	0	0	0	2	0	3	0	0	0		3.23799	0	2.90135	0	0	0
116	1	P24549	AL1A1_MOUSE		7.6	501	54469	Retinal dehydrogenase 1 OS=Mus musculus GN=Aldh1a1 PE=1 SV=5	21	21	1	0	0	1	6	8	6	0	0	1	6	8	6	0	0	1	6	8	6		0	0	0.967118	6.11829	7.63602	5.81959
117	1	P25085	IL1RA_MOUSE		15.7	178	20275	Interleukin-1 receptor antagonist protein OS=Mus musculus GN=Il1rn PE=2 SV=1	2	2	1	0	0	2	0	0	0	0	0	2	0	0	0	0	0	2	0	0	0		0	0	1.93424	0	0	0
118	1	P25688	URIC_MOUSE		32.7	303	35040	Uricase OS=Mus musculus GN=Uox PE=1 SV=2	23	23	1	0	0	6	6	7	4	0	0	6	6	7	4	0	0	6	6	7	4		0	0	5.80271	6.11829	6.68151	3.87973
119	1	P26883	FKB1A_MOUSE		29.6	108	11924	Peptidyl-prolyl cis-trans isomerase FKBP1A OS=Mus musculus GN=Fkbp1a PE=1 SV=2	10	10	1	1	0	4	1	2	2	1	0	4	1	2	2	1	0	4	1	2	2		1.619	0	3.86847	1.01971	1.909	1.93986
120	1	P27773	PDIA3_MOUSE		24.6	505	56679	Protein disulfide-isomerase A3 OS=Mus musculus GN=Pdia3 PE=1 SV=2	21	21	1	1	0	6	9	3	2	1	0	6	9	3	2	1	0	6	9	3	2		1.619	0	5.80271	9.17743	2.86351	1.93986
121	1	P28271	ACOC_MOUSE		12.8	889	98127	Cytoplasmic aconitate hydratase OS=Mus musculus GN=Aco1 PE=1 SV=3	16	16	1	0	0	9	1	4	2	0	0	9	1	4	2	0	0	9	1	4	2		0	0	8.70406	1.01971	3.81801	1.93986
122	1	P28798	GRN_MOUSE		8.5	589	63459	Granulins OS=Mus musculus GN=Grn PE=1 SV=2	12	12	1	1	0	4	2	2	3	1	0	4	2	2	3	1	0	4	2	2	3		1.619	0	3.86847	2.03943	1.909	2.9098
123	1	P29595	NEDD8_MOUSE		17.3	81	8973	NEDD8 OS=Mus musculus GN=Nedd8 PE=1 SV=2	15	15	1	1	0	5	3	4	2	1	0	5	3	4	2	1	0	5	3	4	2		1.619	0	4.83559	3.05914	3.81801	1.93986
124	1	P30115	GSTA3_MOUSE		53.4	221	25362	Glutathione S-transferase A3 OS=Mus musculus GN=Gsta3 PE=1 SV=2	275	159	0.578	49	3	68	53	48	54	25	0	41	32	28	33	49	1.5	67.929	49.114	42.565	49.902	P13745, P24472, P30115	79.3308	8.70406	65.6954	50.0823	40.6284	48.4016
125	1	P31786	ACBP_MOUSE		71.3	87	10001	Acyl-CoA-binding protein OS=Mus musculus GN=Dbi PE=1 SV=2	141	141	1	29	2	32	30	25	23	29	2	32	30	25	23	29	2	32	30	25	23		46.9509	11.6054	30.9478	30.5914	23.8626	22.3084
126	1	P32020	NLTP_MOUSE		3.8	547	59127	Non-specific lipid-transfer protein OS=Mus musculus GN=Scp2 PE=1 SV=3	15	15	1	2	1	4	3	3	2	2	1	4	3	3	2	2	1	4	3	3	2		3.23799	5.80271	3.86847	3.05914	2.86351	1.93986
127	1	P32848	PRVA_MOUSE		65.5	110	11932	Parvalbumin alpha OS=Mus musculus GN=Pvalb PE=1 SV=3	10	10	1	10	0	0	0	0	0	10	0	0	0	0	0	10	0	0	0	0	0		16.19	0	0	0	0	0
128	1	P34884	MIF_MOUSE		32.2	115	12505	Macrophage migration inhibitory factor OS=Mus musculus GN=Mif PE=1 SV=2	28	28	1	3	0	11	5	5	4	3	0	11	5	5	4	3	0	11	5	5	4		4.85699	0	10.6383	5.09857	4.77251	3.87973
129	1	P35278	RAB5C_MOUSE		11.6	216	23414	Ras-related protein Rab-5C OS=Mus musculus GN=Rab5c PE=1 SV=2	4	2	0.5	0	0	0	1	1	2	0	0	0	0	1	1	0	0	0	0.5	1	2	P35278, Q9CQD1	0	0	0	0.509857	0.954502	1.93986
130	1	P35505	FAAA_MOUSE		50.1	419	46177	Fumarylacetoacetase OS=Mus musculus GN=Fah PE=1 SV=2	82	82	1	20	0	21	10	18	13	20	0	21	10	18	13	20	0	21	10	18	13		32.3799	0	20.3095	10.1971	17.181	12.6091
131	1	P35700	PRDX1_MOUSE		72.9	199	22178	Peroxiredoxin-1 OS=Mus musculus GN=Prdx1 PE=1 SV=1	63	63	1	1	1	9	17	20	15	1	1	9	17	20	15	1	1	9	17	20	15		1.619	5.80271	8.70406	17.3351	19.09	14.549
132	1	P36552	HEM6_MOUSE		7.4	443	49716	Oxygen-dependent coproporphyrinogen-III oxidase, mitochondrial OS=Mus musculus GN=Cpox PE=1 SV=2	9	9	1	1	0	1	2	3	2	1	0	1	2	3	2	1	0	1	2	3	2		1.619	0	0.967118	2.03943	2.86351	1.93986
133	1	P37804	TAGL_MOUSE		14.4	201	22577	Transgelin OS=Mus musculus GN=Tagln PE=1 SV=3	4	4	1	0	0	0	1	1	2	0	0	0	1	1	2	0	0	0	1	1	2		0	0	0	1.01971	0.954502	1.93986
134	1	P38060	HMGCL_MOUSE		7.7	325	34240	Hydroxymethylglutaryl-CoA lyase, mitochondrial OS=Mus musculus GN=Hmgcl PE=1 SV=2	4	4	1	0	0	0	2	1	1	0	0	0	2	1	1	0	0	0	2	1	1		0	0	0	2.03943	0.954502	0.969932
135	1	P40142	TKT_MOUSE		10.4	623	67631	Transketolase OS=Mus musculus GN=Tkt PE=1 SV=1	4	4	1	0	0	0	1	0	3	0	0	0	1	0	3	0	0	0	1	0	3		0	0	0	1.01971	0	2.9098
136	1	P40936	INMT_MOUSE		37.9	264	29461	Indolethylamine N-methyltransferase OS=Mus musculus GN=Inmt PE=1 SV=1	23	23	1	0	0	0	11	7	5	0	0	0	11	7	5	0	0	0	11	7	5		0	0	0	11.2169	6.68151	4.84966
137	1	P42125	ECI1_MOUSE		29.8	289	32251	Enoyl-CoA delta isomerase 1, mitochondrial OS=Mus musculus GN=Eci1 PE=1 SV=2	48	48	1	3	0	13	12	11	9	3	0	13	12	11	9	3	0	13	12	11	9		4.85699	0	12.5725	12.2366	10.4995	8.72939
138	1	P43137	LIT1_MOUSE		55.2	165	18520	Lithostathine-1 OS=Mus musculus GN=Reg1 PE=1 SV=1	15	15	1	15	0	0	0	0	0	15	0	0	0	0	0	15	0	0	0	0	0		24.2849	0	0	0	0	0
139	1	P45591	COF2_MOUSE		35.5	166	18711	Cofilin-2 OS=Mus musculus GN=Cfl2 PE=1 SV=1	20	13	0.65	0	0	4	4	6	6	0	0	2	2	5	4	0	0	2.222	2.286	5.5	4.615	P18760, P45591	0	0	2.14894	2.33107	5.24976	4.47624
140	1	P45878	FKBP2_MOUSE		30	140	15345	Peptidyl-prolyl cis-trans isomerase FKBP2 OS=Mus musculus GN=Fkbp2 PE=1 SV=1	12	12	1	2	0	3	3	3	1	2	0	3	3	3	1	2	0	3	3	3	1		3.23799	0	2.90135	3.05914	2.86351	0.969932
141	1	P46638	RB11B_MOUSE		27.5	218	24490	Ras-related protein Rab-11B OS=Mus musculus GN=Rab11b PE=1 SV=3	7	7	1	0	0	4	2	0	1	0	0	4	2	0	1	0	0	4	2	0	1		0	0	3.86847	2.03943	0	0.969932
141.01	1	P62492	RB11A_MOUSE	redundant	27.8	216	24395	Ras-related protein Rab-11A OS=Mus musculus GN=Rab11a PE=1 SV=3	7	7	1	0	0	4	2	0	1	0	0	4	2	0	1	0	0	4	2	0	1		0	0	3.86847	2.03943	0	0.969932
142	1	P47941	CRKL_MOUSE		20.5	303	33831	Crk-like protein OS=Mus musculus GN=Crkl PE=1 SV=2	9	9	1	0	0	3	3	2	1	0	0	3	3	2	1	0	0	3	3	2	1		0	0	2.90135	3.05914	1.909	0.969932
143	1	P48036	ANXA5_MOUSE		15.4	319	35753	Annexin A5 OS=Mus musculus GN=Anxa5 PE=1 SV=1	9	9	1	0	0	3	2	3	1	0	0	3	2	3	1	0	0	3	2	3	1		0	0	2.90135	2.03943	2.86351	0.969932
144	1	P48758	CBR1_MOUSE		28.2	277	30642	Carbonyl reductase [NADPH] 1 OS=Mus musculus GN=Cbr1 PE=1 SV=3	11	11	1	1	0	2	1	2	5	1	0	2	1	2	5	1	0	2	1	2	5		1.619	0	1.93424	1.01971	1.909	4.84966
145	1	P49429	HPPD_MOUSE		53.2	393	45055	4-hydroxyphenylpyruvate dioxygenase OS=Mus musculus GN=Hpd PE=1 SV=3	118	118	1	16	0	33	26	24	19	16	0	33	26	24	19	16	0	33	26	24	19		25.9039	0	31.9149	26.5126	22.908	18.4287
146	1	P49935	CATH_MOUSE		15.6	333	37171	Pro-cathepsin H OS=Mus musculus GN=Ctsh PE=1 SV=2	14	14	1	5	0	3	1	3	2	5	0	3	1	3	2	5	0	3	1	3	2		8.09498	0	2.90135	1.01971	2.86351	1.93986
147	1	P51660	DHB4_MOUSE		15.8	735	79483	Peroxisomal multifunctional enzyme type 2 OS=Mus musculus GN=Hsd17b4 PE=1 SV=3	19	19	1	0	0	0	7	6	6	0	0	0	7	6	6	0	0	0	7	6	6		0	0	0	7.138	5.72701	5.81959
148	1	P52196	THTR_MOUSE		45.1	297	33467	Thiosulfate sulfurtransferase OS=Mus musculus GN=Tst PE=1 SV=3	144	144	1	7	0	20	42	40	35	7	0	20	42	40	35	7	0	20	42	40	35		11.333	0	19.3424	42.828	38.1801	33.9476
149	1	P52760	UK114_MOUSE		95.6	135	14256	Ribonuclease UK114 OS=Mus musculus GN=Hrsp12 PE=1 SV=3	304	304	1	41	2	63	71	64	63	41	2	63	71	64	63	41	2	63	71	64	63		66.3788	11.6054	60.9284	72.3997	61.0881	61.1057
150	1	P53811	PIPNB_MOUSE		12.9	271	31488	Phosphatidylinositol transfer protein beta isoform OS=Mus musculus GN=Pitpnb PE=1 SV=2	2	2	1	0	0	0	2	0	0	0	0	0	2	0	0	0	0	0	2	0	0		0	0	0	2.03943	0	0
151	1	P54071	IDHP_MOUSE		5.5	452	50907	Isocitrate dehydrogenase [NADP], mitochondrial OS=Mus musculus GN=Idh2 PE=1 SV=3	2	1	0.5	0	0	2	0	0	0	0	0	1	0	0	0	0	0	1.083	0	0	0	O88844, P54071	0	0	1.04739	0	0	0
152	1	P54728	RD23B_MOUSE		5	416	43514	UV excision repair protein RAD23 homolog B OS=Mus musculus GN=Rad23b PE=1 SV=2	9	9	1	1	0	1	3	2	2	1	0	1	3	2	2	1	0	1	3	2	2		1.619	0	0.967118	3.05914	1.909	1.93986
153	1	P54869	HMCS2_MOUSE		11	508	56824	Hydroxymethylglutaryl-CoA synthase, mitochondrial OS=Mus musculus GN=Hmgcs2 PE=1 SV=2	13	13	1	0	0	1	5	3	4	0	0	1	5	3	4	0	0	1	5	3	4		0	0	0.967118	5.09857	2.86351	3.87973
154	1	P55050	FABPI_MOUSE		28	132	15127	Fatty acid-binding protein, intestinal OS=Mus musculus GN=Fabp2 PE=1 SV=2	22	22	1	4	0	6	4	4	4	4	0	6	4	4	4	4	0	6	4	4	4		6.47598	0	5.80271	4.07886	3.81801	3.87973
155	1	P55264	ADK_MOUSE		6.9	361	40150	Adenosine kinase OS=Mus musculus GN=Adk PE=1 SV=2	2	2	1	0	0	0	2	0	0	0	0	0	2	0	0	0	0	0	2	0	0		0	0	0	2.03943	0	0
156	1	P56375	ACYP2_MOUSE		24.5	106	11879	Acylphosphatase-2 OS=Mus musculus GN=Acyp2 PE=1 SV=2	2	2	1	2	0	0	0	0	0	2	0	0	0	0	0	2	0	0	0	0	0		3.23799	0	0	0	0	0
157	1	P56376	ACYP1_MOUSE		26.3	99	11242	Acylphosphatase-1 OS=Mus musculus GN=Acyp1 PE=1 SV=2	14	14	1	0	0	3	3	4	4	0	0	3	3	4	4	0	0	3	3	4	4		0	0	2.90135	3.05914	3.81801	3.87973
158	1	P56380	AP4A_MOUSE		38.8	147	16990	Bis(5'-nucleosyl)-tetraphosphatase [asymmetrical] OS=Mus musculus GN=Nudt2 PE=1 SV=3	6	6	1	0	0	3	0	2	1	0	0	3	0	2	1	0	0	3	0	2	1		0	0	2.90135	0	1.909	0.969932
159	1	P56812	PDCD5_MOUSE		19.8	126	14276	Programmed cell death protein 5 OS=Mus musculus GN=Pdcd5 PE=1 SV=3	8	8	1	1	0	0	2	2	3	1	0	0	2	2	3	1	0	0	2	2	3		1.619	0	0	2.03943	1.909	2.9098
160	1	P56959	FUS_MOUSE		6.4	518	52674	RNA-binding protein FUS OS=Mus musculus GN=Fus PE=1 SV=1	24	24	1	0	0	4	7	6	7	0	0	4	7	6	7	0	0	4	7	6	7		0	0	3.86847	7.138	5.72701	6.78952
161	1	P58044	IDI1_MOUSE		35.7	227	26290	Isopentenyl-diphosphate Delta-isomerase 1 OS=Mus musculus GN=Idi1 PE=1 SV=1	21	21	1	3	0	10	3	5	0	3	0	10	3	5	0	3	0	10	3	5	0		4.85699	0	9.67118	3.05914	4.77251	0
162	1	P60335	PCBP1_MOUSE		7.6	356	37499	Poly(rC)-binding protein 1 OS=Mus musculus GN=Pcbp1 PE=1 SV=1	8	8	1	0	0	3	1	2	2	0	0	3	1	2	2	0	0	3	1	2	2		0	0	2.90135	1.01971	1.909	1.93986
163	1	P61082	UBC12_MOUSE		10.9	183	20901	NEDD8-conjugating enzyme Ubc12 OS=Mus musculus GN=Ube2m PE=1 SV=1	2	2	1	0	0	2	0	0	0	0	0	2	0	0	0	0	0	2	0	0	0		0	0	1.93424	0	0	0
164	1	P61458	PHS_MOUSE		51	104	11987	Pterin-4-alpha-carbinolamine dehydratase OS=Mus musculus GN=Pcbd1 PE=1 SV=2	16	16	1	0	0	5	4	3	4	0	0	5	4	3	4	0	0	5	4	3	4		0	0	4.83559	4.07886	2.86351	3.87973
165	1	P61922	GABT_MOUSE		23.4	500	56453	4-aminobutyrate aminotransferase, mitochondrial OS=Mus musculus GN=Abat PE=1 SV=1	23	23	1	5	0	7	2	3	6	5	0	7	2	3	6	5	0	7	2	3	6		8.09498	0	6.76983	2.03943	2.86351	5.81959
166	1	P61961	UFM1_MOUSE		50.6	85	9119	Ubiquitin-fold modifier 1 OS=Mus musculus GN=Ufm1 PE=1 SV=1	5	5	1	0	0	2	1	1	1	0	0	2	1	1	1	0	0	2	1	1	1		0	0	1.93424	1.01971	0.954502	0.969932
167	1	P61979	HNRPK_MOUSE		11.4	463	50977	Heterogeneous nuclear ribonucleoprotein K OS=Mus musculus GN=Hnrnpk PE=1 SV=1	15	15	1	1	0	2	3	3	6	1	0	2	3	3	6	1	0	2	3	3	6		1.619	0	1.93424	3.05914	2.86351	5.81959
168	1	P62204	CALM_MOUSE		22.1	149	16839	Calmodulin OS=Mus musculus GN=Calm1 PE=1 SV=2	2	2	1	0	0	2	0	0	0	0	0	2	0	0	0	0	0	2	0	0	0		0	0	1.93424	0	0	0
169	1	P62774	MTPN_MOUSE		25.4	118	12862	Myotrophin OS=Mus musculus GN=Mtpn PE=1 SV=2	14	14	1	1	0	2	3	3	5	1	0	2	3	3	5	1	0	2	3	3	5		1.619	0	1.93424	3.05914	2.86351	4.84966
170	1	P62897	CYC_MOUSE		32.4	105	11606	Cytochrome c, somatic OS=Mus musculus GN=Cycs PE=1 SV=2	15	15	1	2	0	9	1	2	1	2	0	9	1	2	1	2	0	9	1	2	1		3.23799	0	8.70406	1.01971	1.909	0.969932
171	1	P62960	YBOX1_MOUSE		11.2	322	35731	Nuclease-sensitive element-binding protein 1 OS=Mus musculus GN=Ybx1 PE=1 SV=3	2	2	1	2	0	0	0	0	0	2	0	0	0	0	0	2	0	0	0	0	0		3.23799	0	0	0	0	0
172	1	P62962	PROF1_MOUSE		64.3	140	14958	Profilin-1 OS=Mus musculus GN=Pfn1 PE=1 SV=2	73	73	1	4	0	18	11	27	13	4	0	18	11	27	13	4	0	18	11	27	13		6.47598	0	17.4081	11.2169	25.7716	12.6091
173	1	P63017	HSP7C_MOUSE		23.8	646	70872	Heat shock cognate 71 kDa protein OS=Mus musculus GN=Hspa8 PE=1 SV=1	21	17	0.81	0	0	6	5	6	4	0	0	5	4	5	3	0	0	6	4.8	6	4	P20029, P63017	0	0	5.80271	4.89463	5.72701	3.87973
174	1	P63028	TCTP_MOUSE		15.7	172	19463	Translationally-controlled tumor protein OS=Mus musculus GN=Tpt1 PE=1 SV=1	7	7	1	0	0	2	1	2	2	0	0	2	1	2	2	0	0	2	1	2	2		0	0	1.93424	1.01971	1.909	1.93986
175	1	P63242	IF5A1_MOUSE		15.6	154	16833	Eukaryotic translation initiation factor 5A-1 OS=Mus musculus GN=Eif5a PE=1 SV=2	2	2	1	0	0	2	0	0	0	0	0	2	0	0	0	0	0	2	0	0	0		0	0	1.93424	0	0	0
176	1	P68037	UB2L3_MOUSE		47.4	154	17863	Ubiquitin-conjugating enzyme E2 L3 OS=Mus musculus GN=Ube2l3 PE=1 SV=1	45	45	1	1	0	12	16	8	8	1	0	12	16	8	8	1	0	12	16	8	8		1.619	0	11.6054	16.3154	7.63602	7.75946
177	1	P70296	PEBP1_MOUSE		80.2	187	20831	Phosphatidylethanolamine-binding protein 1 OS=Mus musculus GN=Pebp1 PE=1 SV=3	142	142	1	11	0	24	28	39	40	11	0	24	28	39	40	11	0	24	28	39	40		17.809	0	23.2108	28.552	37.2256	38.7973
178	1	P70302	STIM1_MOUSE		3.9	685	77568	Stromal interaction molecule 1 OS=Mus musculus GN=Stim1 PE=1 SV=2	11	11	1	1	7	0	1	0	2	1	7	0	1	0	2	1	7	0	1	0	2		1.619	40.619	0	1.01971	0	1.93986
179	1	P70694	DHB5_MOUSE		36.2	323	37049	Estradiol 17 beta-dehydrogenase 5 OS=Mus musculus GN=Akr1c6 PE=1 SV=1	45	35	0.778	4	0	10	10	9	12	2	0	7	9	7	10	2.571	0	9.625	10	8.4	12	P70694, Q8VCX1	4.16244	0	9.30851	10.1971	8.01782	11.6392
180	1	P97328	KHK_MOUSE		10.7	298	32751	Ketohexokinase OS=Mus musculus GN=Khk PE=1 SV=1	12	12	1	2	0	6	0	2	2	2	0	6	0	2	2	2	0	6	0	2	2		3.23799	0	5.80271	0	1.909	1.93986
181	1	P97493	THIOM_MOUSE		26.5	166	18256	Thioredoxin, mitochondrial OS=Mus musculus GN=Txn2 PE=1 SV=1	32	32	1	0	0	5	7	12	8	0	0	5	7	12	8	0	0	5	7	12	8		0	0	4.83559	7.138	11.454	7.75946
182	1	P99029	PRDX5_MOUSE		45.7	210	21898	Peroxiredoxin-5, mitochondrial OS=Mus musculus GN=Prdx5 PE=1 SV=2	143	143	1	9	0	37	37	29	31	9	0	37	37	29	31	9	0	37	37	29	31		14.571	0	35.7834	37.7294	27.6806	30.0679
183	1	Q00623	APOA1_MOUSE		14	264	30617	Apolipoprotein A-I OS=Mus musculus GN=Apoa1 PE=1 SV=2	8	8	1	0	0	1	1	3	3	0	0	1	1	3	3	0	0	1	1	3	3		0	0	0.967118	1.01971	2.86351	2.9098
184	1	Q00915	RET1_MOUSE		33.3	135	15847	Retinol-binding protein 1 OS=Mus musculus GN=Rbp1 PE=1 SV=2	14	14	1	0	0	1	4	6	3	0	0	1	4	6	3	0	0	1	4	6	3		0	0	0.967118	4.07886	5.72701	2.9098
185	1	Q01768	NDKB_MOUSE		32.2	152	17364	Nucleoside diphosphate kinase B OS=Mus musculus GN=Nme2 PE=1 SV=1	20	20	1	0	0	10	3	4	3	0	0	10	3	4	3	0	0	10	3	4	3		0	0	9.67118	3.05914	3.81801	2.9098
186	1	Q03265	ATPA_MOUSE		8	553	59754	ATP synthase subunit alpha, mitochondrial OS=Mus musculus GN=Atp5a1 PE=1 SV=1	10	10	1	0	0	0	3	5	2	0	0	0	3	5	2	0	0	0	3	5	2		0	0	0	3.05914	4.77251	1.93986
187	1	Q05793	PGBM_MOUSE		0.8	3707	398295	Basement membrane-specific heparan sulfate proteoglycan core protein OS=Mus musculus GN=Hspg2 PE=1 SV=1	4	4	1	0	0	0	1	2	1	0	0	0	1	2	1	0	0	0	1	2	1		0	0	0	1.01971	1.909	0.969932
188	1	Q05816	FABP5_MOUSE		72.6	135	15138	Fatty acid-binding protein, epidermal OS=Mus musculus GN=Fabp5 PE=1 SV=3	43	43	1	4	0	25	4	6	4	4	0	25	4	6	4	4	0	25	4	6	4		6.47598	0	24.1779	4.07886	5.72701	3.87973
189	1	Q07076	ANXA7_MOUSE		6.7	463	49926	Annexin A7 OS=Mus musculus GN=Anxa7 PE=1 SV=2	4	4	1	0	0	0	1	2	1	0	0	0	1	2	1	0	0	0	1	2	1		0	0	0	1.01971	1.909	0.969932
190	1	Q08731	LIT2_MOUSE		45.7	173	19408	Lithostathine-2 OS=Mus musculus GN=Reg2 PE=1 SV=1	12	12	1	12	0	0	0	0	0	12	0	0	0	0	0	12	0	0	0	0	0		19.428	0	0	0	0	0
191	1	Q14DH7	ACSS3_MOUSE		4.1	682	74519	Acyl-CoA synthetase short-chain family member 3, mitochondrial OS=Mus musculus GN=Acss3 PE=1 SV=2	4	4	1	0	0	0	1	1	2	0	0	0	1	1	2	0	0	0	1	1	2		0	0	0	1.01971	0.954502	1.93986
192	1	Q3TTY5	K22E_MOUSE		5	707	70924	Keratin, type II cytoskeletal 2 epidermal OS=Mus musculus GN=Krt2 PE=1 SV=1	5	0	0	1	3	0	1	0	0	0	0	0	0	0	0	0	0	0	0	0	0	CONT_049, CONT_064, CONT_070, CONT_073, CONT_079, CONT_088, CONT_102, CONT_129, CONT_133, P04104, P11679, Q3TTY5, Q3UV17, Q6IFZ6, Q6IME9, Q6NXH9, Q8BGZ7, Q922U2	0	0	0	0	0	0
193	1	Q3UPL0	SC31A_MOUSE		1.6	1230	133570	Protein transport protein Sec31A OS=Mus musculus GN=Sec31a PE=1 SV=2	10	10	1	0	0	2	2	3	3	0	0	2	2	3	3	0	0	2	2	3	3		0	0	1.93424	2.03943	2.86351	2.9098
194	1	Q3UV17	K22O_MOUSE		7.4	594	62846	Keratin, type II cytoskeletal 2 oral OS=Mus musculus GN=Krt76 PE=1 SV=1	25	0	0	6	7	2	4	4	2	0	0	0	0	0	0	0.667	0.5	0.167	0.5	0.5	0.167	CONT_049, CONT_064, CONT_070, CONT_073, CONT_079, CONT_089, CONT_102, CONT_129, CONT_133, P04104, P11679, Q3TTY5, Q3UV17, Q6IFZ6, Q6IME9, Q6NXH9, Q8BGZ7, Q922U2	1.07987	2.90135	0.161509	0.509857	0.477251	0.161979
195	1	Q4VAA2	CDV3_MOUSE		11	281	29730	Protein CDV3 OS=Mus musculus GN=Cdv3 PE=1 SV=2	3	3	1	1	0	2	0	0	0	1	0	2	0	0	0	1	0	2	0	0	0		1.619	0	1.93424	0	0	0
196	1	Q58A65	JIP4_MOUSE		2.5	1321	146220	C-Jun-amino-terminal kinase-interacting protein 4 OS=Mus musculus GN=Spag9 PE=1 SV=2	8	8	1	0	0	2	1	3	2	0	0	2	1	3	2	0	0	2	1	3	2		0	0	1.93424	1.01971	2.86351	1.93986
197	1	Q5FW57	GLYAL_MOUSE		37.2	296	34169	Glycine N-acyltransferase-like protein OS=Mus musculus GN=Gm4952 PE=1 SV=3	23	23	1	0	0	3	4	7	9	0	0	3	4	7	9	0	0	3	4	7	9		0	0	2.90135	4.07886	6.68151	8.72939
198	1	Q5FW60	MUP20_MOUSE		15.5	181	20931	Major urinary protein 20 OS=Mus musculus GN=Mup20 PE=1 SV=1	2	1	0.5	0	0	2	0	0	0	0	0	1	0	0	0	0	0	1.333	0	0	0	P04939, Q5FW60	0	0	1.28917	0	0	0
199	1	Q60598	SRC8_MOUSE		6.6	546	61251	Src substrate cortactin OS=Mus musculus GN=Cttn PE=1 SV=2	8	8	1	0	0	5	1	1	1	0	0	5	1	1	1	0	0	5	1	1	1		0	0	4.83559	1.01971	0.954502	0.969932
200	1	Q60866	PTER_MOUSE		21.5	349	39219	Phosphotriesterase-related protein OS=Mus musculus GN=Pter PE=1 SV=1	12	12	1	4	0	4	1	1	2	4	0	4	1	1	2	4	0	4	1	1	2		6.47598	0	3.86847	1.01971	0.954502	1.93986
201	1	Q61029	LAP2B_MOUSE		10.8	452	50374	Lamina-associated polypeptide 2, isoforms beta/delta/epsilon/gamma OS=Mus musculus GN=Tmpo PE=1 SV=4	28	28	1	2	0	8	7	5	6	2	0	8	7	5	6	2	0	8	7	5	6		3.23799	0	7.73694	7.138	4.77251	5.81959
202	1	Q61133	GSTT2_MOUSE		20.5	244	27635	Glutathione S-transferase theta-2 OS=Mus musculus GN=Gstt2 PE=1 SV=4	12	12	1	0	0	1	3	3	5	0	0	1	3	3	5	0	0	1	3	3	5		0	0	0.967118	3.05914	2.86351	4.84966
203	1	Q61176	ARGI1_MOUSE		60.7	323	34809	Arginase-1 OS=Mus musculus GN=Arg1 PE=1 SV=1	161	161	1	14	0	55	33	34	25	14	0	55	33	34	25	14	0	55	33	34	25		22.6659	0	53.1915	33.6506	32.4531	24.2483
204	1	Q61207	SAP_MOUSE		12.2	557	61423	Prosaposin OS=Mus musculus GN=Psap PE=1 SV=2	36	36	1	4	0	13	6	8	5	4	0	13	6	8	5	4	0	13	6	8	5		6.47598	0	12.5725	6.11829	7.63602	4.84966
205	1	Q61425	HCDH_MOUSE		20.4	314	34465	Hydroxyacyl-coenzyme A dehydrogenase, mitochondrial OS=Mus musculus GN=Hadh PE=1 SV=2	26	26	1	3	0	6	6	7	4	3	0	6	6	7	4	3	0	6	6	7	4		4.85699	0	5.80271	6.11829	6.68151	3.87973
206	1	Q61598	GDIB_MOUSE		46.1	445	50538	Rab GDP dissociation inhibitor beta OS=Mus musculus GN=Gdi2 PE=1 SV=1	39	39	1	0	0	17	7	5	10	0	0	17	7	5	10	0	0	17	7	5	10		0	0	16.441	7.138	4.77251	9.69932
207	1	Q61792	LASP1_MOUSE		10.6	263	29995	LIM and SH3 domain protein 1 OS=Mus musculus GN=Lasp1 PE=1 SV=1	8	8	1	0	0	1	2	3	2	0	0	1	2	3	2	0	0	1	2	3	2		0	0	0.967118	2.03943	2.86351	1.93986
208	1	Q62418	DBNL_MOUSE		9.6	436	48701	Drebrin-like protein OS=Mus musculus GN=Dbnl PE=1 SV=2	3	3	1	0	0	2	0	0	1	0	0	2	0	0	1	0	0	2	0	0	1		0	0	1.93424	0	0	0.969932
209	1	Q62426	CYTB_MOUSE		32.7	98	11047	Cystatin-B OS=Mus musculus GN=Cstb PE=1 SV=1	7	7	1	1	0	2	2	1	1	1	0	2	2	1	1	1	0	2	2	1	1		1.619	0	1.93424	2.03943	0.954502	0.969932
210	1	Q62446	FKBP3_MOUSE		23.2	224	25149	Peptidyl-prolyl cis-trans isomerase FKBP3 OS=Mus musculus GN=Fkbp3 PE=1 SV=2	5	5	1	0	0	1	2	1	1	0	0	1	2	1	1	0	0	1	2	1	1		0	0	0.967118	2.03943	0.954502	0.969932
211	1	Q63836	SBP2_MOUSE		79.4	472	52611	Selenium-binding protein 2 OS=Mus musculus GN=Selenbp2 PE=1 SV=2	259	29	0.112	34	2	121	37	33	32	4	0	23	1	1	0	12.571	1	87.4	5	4.556	0	P17563, Q63836	20.3524	5.80271	84.5261	5.09857	4.34871	0
212	1	Q64105	SPRE_MOUSE		22.6	261	27884	Sepiapterin reductase OS=Mus musculus GN=Spr PE=1 SV=1	12	12	1	3	0	7	0	1	1	3	0	7	0	1	1	3	0	7	0	1	1		4.85699	0	6.76983	0	0.954502	0.969932
213	1	Q64374	RGN_MOUSE		83.9	299	33408	Regucalcin OS=Mus musculus GN=Rgn PE=1 SV=1	440	440	1	81	2	101	72	94	90	81	2	101	72	94	90	81	2	101	72	94	90		131.139	11.6054	97.6789	73.4194	89.7232	87.2939
214	1	Q64433	CH10_MOUSE		42.2	102	10964	10 kDa heat shock protein, mitochondrial OS=Mus musculus GN=Hspe1 PE=1 SV=2	16	16	1	2	0	5	3	4	2	2	0	5	3	4	2	2	0	5	3	4	2		3.23799	0	4.83559	3.05914	3.81801	1.93986
215	1	Q64442	DHSO_MOUSE		24.9	357	38250	Sorbitol dehydrogenase OS=Mus musculus GN=Sord PE=1 SV=3	14	14	1	5	0	3	1	3	2	5	0	3	1	3	2	5	0	3	1	3	2		8.09498	0	2.90135	1.01971	2.86351	1.93986
216	1	Q64471	GSTT1_MOUSE		10.4	240	27375	Glutathione S-transferase theta-1 OS=Mus musculus GN=Gstt1 PE=1 SV=4	3	3	1	0	0	0	1	0	2	0	0	0	1	0	2	0	0	0	1	0	2		0	0	0	1.01971	0	1.93986
217	1	Q6IFZ6	K2C1B_MOUSE		5.9	572	61360	Keratin, type II cytoskeletal 1b OS=Mus musculus GN=Krt77 PE=1 SV=1	41	0	0	5	24	3	4	3	2	0	0	0	0	0	0	0	0	0	0	0	0	CONT_049, CONT_064, CONT_070, CONT_073, CONT_079, CONT_088, CONT_089, CONT_102, CONT_129, CONT_133, P04104, P11679, Q3TTY5, Q3UV17, Q6IFZ6, Q6IME9, Q6NXH9, Q8BGZ7, Q922U2	0	0	0	0	0	0
218	1	Q6IME9	K2C72_MOUSE		3.7	520	56751	Keratin, type II cytoskeletal 72 OS=Mus musculus GN=Krt72 PE=3 SV=1	15	0	0	4	3	1	3	3	1	0	0	0	0	0	0	0.667	0	0.167	0.5	0.5	0.167	CONT_049, CONT_064, CONT_070, CONT_073, CONT_079, CONT_102, CONT_129, CONT_133, P04104, P11679, Q3TTY5, Q3UV17, Q6IFZ6, Q6IME9, Q6NXH9, Q8BGZ7, Q922U2	1.07987	0	0.161509	0.509857	0.477251	0.161979
219	1	Q6NXH9	K2C73_MOUSE		5.6	539	58912	Keratin, type II cytoskeletal 73 OS=Mus musculus GN=Krt73 PE=1 SV=1	33	0	0	4	17	3	4	3	2	0	0	0	0	0	0	0	0	0	0	0	0	CONT_049, CONT_064, CONT_070, CONT_073, CONT_079, CONT_088, CONT_089, CONT_102, CONT_129, CONT_133, P04104, P11679, Q3TTY5, Q3UV17, Q6IFZ6, Q6IME9, Q6NXH9, Q8BGZ7, Q922U2, Q9Z2T6	0	0	0	0	0	0
220	1	Q6P8U6	LIPP_MOUSE		24.7	465	51429	Pancreatic triacylglycerol lipase OS=Mus musculus GN=Pnlip PE=1 SV=1	12	12	1	10	0	0	0	0	2	10	0	0	0	0	2	10	0	0	0	0	2		16.19	0	0	0	0	1.93986
221	1	Q71RI9	KAT3_MOUSE		5.7	455	51127	Kynurenine--oxoglutarate transaminase 3 OS=Mus musculus GN=Ccbl2 PE=1 SV=1	3	3	1	0	0	1	0	2	0	0	0	1	0	2	0	0	0	1	0	2	0		0	0	0.967118	0	1.909	0
222	1	Q78JT3	3HAO_MOUSE		69.9	286	32805	3-hydroxyanthranilate 3,4-dioxygenase OS=Mus musculus GN=Haao PE=1 SV=1	188	188	1	13	0	54	38	42	41	13	0	54	38	42	41	13	0	54	38	42	41		21.047	0	52.2244	38.7492	40.0891	39.7672
223	1	Q80W21	GSTM7_MOUSE		41.3	218	25711	Glutathione S-transferase Mu 7 OS=Mus musculus GN=Gstm7 PE=1 SV=1	171	8	0.047	24	0	34	34	39	40	2	0	2	1	2	1	3.179	0	3.372	1.563	3.278	1.695	O35660, P10649, P15626, P19639, Q80W21	5.14679	0	3.26112	1.59381	3.12886	1.64403
224	1	Q8BG73	SH3L2_MOUSE		30.8	107	12256	SH3 domain-binding glutamic acid-rich-like protein 2 OS=Mus musculus GN=Sh3bgrl2 PE=1 SV=1	4	4	1	0	0	2	1	1	0	0	0	2	1	1	0	0	0	2	1	1	0		0	0	1.93424	1.01971	0.954502	0
225	1	Q8BGZ7	K2C75_MOUSE		10.3	551	59742	Keratin, type II cytoskeletal 75 OS=Mus musculus GN=Krt75 PE=1 SV=1	26	0	0	7	7	2	4	4	2	0	0	0	0	0	0	1.167	0	0.167	0.5	0.5	0.167	CONT_049, CONT_064, CONT_070, CONT_073, CONT_079, CONT_088, CONT_102, CONT_129, CONT_133, P04104, P11679, Q3TTY5, Q3UV17, Q6IFZ6, Q6IME9, Q6NXH9, Q8BGZ7, Q922U2	1.88937	0	0.161509	0.509857	0.477251	0.161979
226	1	Q8BTI8	SRRM2_MOUSE		1.7	2703	294841	Serine/arginine repetitive matrix protein 2 OS=Mus musculus GN=Srrm2 PE=1 SV=3	3	3	1	2	1	0	0	0	0	2	1	0	0	0	0	2	1	0	0	0	0		3.23799	5.80271	0	0	0	0
227	1	Q8BVI4	DHPR_MOUSE		41.1	241	25571	Dihydropteridine reductase OS=Mus musculus GN=Qdpr PE=1 SV=2	58	58	1	10	0	18	9	11	10	10	0	18	9	11	10	10	0	18	9	11	10		16.19	0	17.4081	9.17743	10.4995	9.69932
228	1	Q8BWN8	ACOT4_MOUSE		5.9	421	46482	Acyl-coenzyme A thioesterase 4 OS=Mus musculus GN=Acot4 PE=1 SV=1	6	2	0.333	0	0	0	2	2	2	0	0	0	0	1	1	0	0	0	1	2	1.5	O55137, Q8BWN8	0	0	0	1.01971	1.909	1.4549
229	1	Q8BWP5	TTPA_MOUSE		32.7	278	32015	Alpha-tocopherol transfer protein OS=Mus musculus GN=Ttpa PE=1 SV=1	14	14	1	0	0	0	1	6	7	0	0	0	1	6	7	0	0	0	1	6	7		0	0	0	1.01971	5.72701	6.78952
230	1	Q8BWT1	THIM_MOUSE		25.2	397	41831	3-ketoacyl-CoA thiolase, mitochondrial OS=Mus musculus GN=Acaa2 PE=1 SV=3	33	33	1	0	0	2	9	11	11	0	0	2	9	11	11	0	0	2	9	11	11		0	0	1.93424	9.17743	10.4995	10.6693
231	1	Q8BZF8	PGM5_MOUSE		4.4	567	62221	Phosphoglucomutase-like protein 5 OS=Mus musculus GN=Pgm5 PE=1 SV=2	9	1	0.111	1	0	2	1	2	3	0	0	0	0	0	1	0	0	0	0	0	1.111	Q8BZF8, Q9D0F9	0	0	0	0	0	1.07759
232	1	Q8C196	CPSM_MOUSE		9.2	1500	164619	Carbamoyl-phosphate synthase [ammonia], mitochondrial OS=Mus musculus GN=Cps1 PE=1 SV=2	15	15	1	0	0	1	6	6	2	0	0	1	6	6	2	0	0	1	6	6	2		0	0	0.967118	6.11829	5.72701	1.93986
233	1	Q8CAY6	THIC_MOUSE		6.8	397	41299	Acetyl-CoA acetyltransferase, cytosolic OS=Mus musculus GN=Acat2 PE=1 SV=2	5	5	1	0	0	0	3	1	1	0	0	0	3	1	1	0	0	0	3	1	1		0	0	0	3.05914	0.954502	0.969932
234	1	Q8CFA2	GCST_MOUSE		18.9	403	44010	Aminomethyltransferase, mitochondrial OS=Mus musculus GN=Amt PE=1 SV=1	5	5	1	0	0	2	0	1	2	0	0	2	0	1	2	0	0	2	0	1	2		0	0	1.93424	0	0.954502	1.93986
235	1	Q8CGC7	SYEP_MOUSE		2.2	1512	170080	Bifunctional glutamate/proline--tRNA ligase OS=Mus musculus GN=Eprs PE=1 SV=4	12	12	1	0	0	3	5	2	2	0	0	3	5	2	2	0	0	3	5	2	2		0	0	2.90135	5.09857	1.909	1.93986
236	1	Q8CHT0	AL4A1_MOUSE		18	562	61842	Delta-1-pyrroline-5-carboxylate dehydrogenase, mitochondrial OS=Mus musculus GN=Aldh4a1 PE=1 SV=3	22	22	1	2	0	3	9	5	3	2	0	3	9	5	3	2	0	3	9	5	3		3.23799	0	2.90135	9.17743	4.77251	2.9098
237	1	Q8CI51	PDLI5_MOUSE		14	591	63300	PDZ and LIM domain protein 5 OS=Mus musculus GN=Pdlim5 PE=1 SV=4	9	9	1	3	0	4	2	0	0	3	0	4	2	0	0	3	0	4	2	0	0		4.85699	0	3.86847	2.03943	0	0
238	1	Q8K0E8	FIBB_MOUSE		4.4	481	54754	Fibrinogen beta chain OS=Mus musculus GN=Fgb PE=1 SV=1	9	9	1	0	0	5	2	1	1	0	0	5	2	1	1	0	0	5	2	1	1		0	0	4.83559	2.03943	0.954502	0.969932
239	1	Q8K157	GALM_MOUSE		22.2	342	37800	Aldose 1-epimerase OS=Mus musculus GN=Galm PE=1 SV=1	31	31	1	7	0	7	6	5	6	7	0	7	6	5	6	7	0	7	6	5	6		11.333	0	6.76983	6.11829	4.77251	5.81959
240	1	Q8K4H1	KFA_MOUSE		7.9	305	34230	Kynurenine formamidase OS=Mus musculus GN=Afmid PE=1 SV=1	3	3	1	0	0	0	0	2	1	0	0	0	0	2	1	0	0	0	0	2	1		0	0	0	0	1.909	0.969932
241	1	Q8K4Z3	NNRE_MOUSE		13.1	282	30974	NAD(P)H-hydrate epimerase OS=Mus musculus GN=Apoa1bp PE=1 SV=1	5	5	1	0	0	0	2	2	1	0	0	0	2	2	1	0	0	0	2	2	1		0	0	0	2.03943	1.909	0.969932
242	1	Q8QZS1	HIBCH_MOUSE		33	385	43039	3-hydroxyisobutyryl-CoA hydrolase, mitochondrial OS=Mus musculus GN=Hibch PE=1 SV=1	39	39	1	0	0	9	2	13	15	0	0	9	2	13	15	0	0	9	2	13	15		0	0	8.70406	2.03943	12.4085	14.549
243	1	Q8R0F8	FAHD1_MOUSE		19.4	227	25173	Acylpyruvase FAHD1, mitochondrial OS=Mus musculus GN=Fahd1 PE=1 SV=2	13	13	1	1	0	6	3	2	1	1	0	6	3	2	1	1	0	6	3	2	1		1.619	0	5.80271	3.05914	1.909	0.969932
244	1	Q8R164	BPHL_MOUSE		63.6	291	32852	Valacyclovir hydrolase OS=Mus musculus GN=Bphl PE=1 SV=1	176	176	1	15	0	51	33	41	36	15	0	51	33	41	36	15	0	51	33	41	36		24.2849	0	49.323	33.6506	39.1346	34.9176
245	1	Q8R1G2	CMBL_MOUSE		34.3	245	27903	Carboxymethylenebutenolidase homolog OS=Mus musculus GN=Cmbl PE=1 SV=1	37	37	1	1	0	14	5	8	9	1	0	14	5	8	9	1	0	14	5	8	9		1.619	0	13.5397	5.09857	7.63602	8.72939
246	1	Q8R317	UBQL1_MOUSE		8.6	582	61977	Ubiquilin-1 OS=Mus musculus GN=Ubqln1 PE=1 SV=1	7	7	1	0	0	3	1	2	1	0	0	3	1	2	1	0	0	3	1	2	1		0	0	2.90135	1.01971	1.909	0.969932
247	1	Q8R3Q6	CCD58_MOUSE		37.5	144	16666	Coiled-coil domain-containing protein 58 OS=Mus musculus GN=Ccdc58 PE=1 SV=1	11	11	1	1	0	1	2	4	3	1	0	1	2	4	3	1	0	1	2	4	3		1.619	0	0.967118	2.03943	3.81801	2.9098
248	1	Q8VC12	HUTU_MOUSE		24.1	676	74591	Urocanate hydratase OS=Mus musculus GN=Uroc1 PE=1 SV=2	38	38	1	0	0	17	6	7	8	0	0	17	6	7	8	0	0	17	6	7	8		0	0	16.441	6.11829	6.68151	7.75946
249	1	Q8VC28	AK1CD_MOUSE		48	323	37059	Aldo-keto reductase family 1 member C13 OS=Mus musculus GN=Akr1c13 PE=1 SV=2	33	33	1	8	0	17	4	3	1	8	0	17	4	3	1	8	0	17	4	3	1		12.952	0	16.441	4.07886	2.86351	0.969932
250	1	Q8VCF0	MAVS_MOUSE		6	503	53400	Mitochondrial antiviral-signaling protein OS=Mus musculus GN=Mavs PE=1 SV=1	5	5	1	0	0	3	0	1	1	0	0	3	0	1	1	0	0	3	0	1	1		0	0	2.90135	0	0.954502	0.969932
251	1	Q8VCH0	THIKB_MOUSE		26.2	424	43996	3-ketoacyl-CoA thiolase B, peroxisomal OS=Mus musculus GN=Acaa1b PE=1 SV=1	10	5	0.5	0	0	0	5	4	1	0	0	0	3	2	0	0	0	0	4.5	4	0.5	Q8VCH0, Q921H8	0	0	0	4.58872	3.81801	0.484966
252	1	Q8VCI0	PLBL1_MOUSE		5.5	550	62999	Phospholipase B-like 1 OS=Mus musculus GN=Plbd1 PE=1 SV=1	2	2	1	2	0	0	0	0	0	2	0	0	0	0	0	2	0	0	0	0	0		3.23799	0	0	0	0	0
253	1	Q8VCR7	ABHEB_MOUSE		31.9	210	22452	Protein ABHD14B OS=Mus musculus GN=Abhd14b PE=1 SV=1	18	18	1	0	0	7	2	4	5	0	0	7	2	4	5	0	0	7	2	4	5		0	0	6.76983	2.03943	3.81801	4.84966
254	1	Q8VCT4	CES1D_MOUSE		7.1	565	61789	Carboxylesterase 1D OS=Mus musculus GN=Ces1d PE=1 SV=1	3	3	1	0	0	0	3	0	0	0	0	0	3	0	0	0	0	0	3	0	0		0	0	0	3.05914	0	0
255	1	Q8VCX1	AK1D1_MOUSE		29.8	325	37291	3-oxo-5-beta-steroid 4-dehydrogenase OS=Mus musculus GN=Akr1d1 PE=1 SV=1	19	9	0.474	7	0	4	1	5	2	5	0	1	0	3	0	6.429	0	1.375	0	3.6	0	P70694, Q8VCX1	10.4085	0	1.32979	0	3.43621	0
256	1	Q91V41	RAB14_MOUSE		20.9	215	23898	Ras-related protein Rab-14 OS=Mus musculus GN=Rab14 PE=1 SV=3	3	3	1	0	0	0	1	2	0	0	0	0	1	2	0	0	0	0	1	2	0		0	0	0	1.01971	1.909	0
257	1	Q91V76	CK054_MOUSE		42.2	315	34997	Ester hydrolase C11orf54 homolog OS=Mus musculus PE=1 SV=1	32	32	1	7	0	9	4	7	5	7	0	9	4	7	5	7	0	9	4	7	5		11.333	0	8.70406	4.07886	6.68151	4.84966
258	1	Q91VA0	ACSM1_MOUSE		18.8	573	64761	Acyl-coenzyme A synthetase ACSM1, mitochondrial OS=Mus musculus GN=Acsm1 PE=1 SV=1	18	18	1	0	0	3	3	8	4	0	0	3	3	8	4	0	0	3	3	8	4		0	0	2.90135	3.05914	7.63602	3.87973
259	1	Q91VH6	MEMO1_MOUSE		13.8	297	33693	Protein MEMO1 OS=Mus musculus GN=Memo1 PE=1 SV=1	3	3	1	1	0	2	0	0	0	1	0	2	0	0	0	1	0	2	0	0	0		1.619	0	1.93424	0	0	0
260	1	Q91VM5	RMXL1_MOUSE		7	388	42163	RNA binding motif protein, X-linked-like-1 OS=Mus musculus GN=Rbmxl1 PE=2 SV=1	6	6	1	0	0	1	2	2	1	0	0	1	2	2	1	0	0	1	2	2	1		0	0	0.967118	2.03943	1.909	0.969932
260.01	1	Q9WV02	RBMX_MOUSE	redundant	6.9	391	42302	RNA-binding motif protein, X chromosome OS=Mus musculus GN=Rbmx PE=1 SV=1	6	6	1	0	0	1	2	2	1	0	0	1	2	2	1	0	0	1	2	2	1		0	0	0.967118	2.03943	1.909	0.969932
261	1	Q91WQ3	SYYC_MOUSE		10.8	528	59106	Tyrosine--tRNA ligase, cytoplasmic OS=Mus musculus GN=Yars PE=1 SV=3	14	14	1	7	0	5	0	1	1	7	0	5	0	1	1	7	0	5	0	1	1		11.333	0	4.83559	0	0.954502	0.969932
262	1	Q91X83	METK1_MOUSE		9.8	396	43510	S-adenosylmethionine synthase isoform type-1 OS=Mus musculus GN=Mat1a PE=1 SV=1	14	14	1	0	0	2	6	3	3	0	0	2	6	3	3	0	0	2	6	3	3		0	0	1.93424	6.11829	2.86351	2.9098
263	1	Q91XE0	GLYAT_MOUSE		40.2	296	34099	Glycine N-acyltransferase OS=Mus musculus GN=Glyat PE=1 SV=1	51	51	1	0	0	15	13	11	12	0	0	15	13	11	12	0	0	15	13	11	12		0	0	14.5068	13.2563	10.4995	11.6392
264	1	Q91Y97	ALDOB_MOUSE		29.7	364	39508	Fructose-bisphosphate aldolase B OS=Mus musculus GN=Aldob PE=1 SV=3	49	49	1	3	0	20	6	11	9	3	0	20	6	11	9	3	0	20	6	11	9		4.85699	0	19.3424	6.11829	10.4995	8.72939
265	1	Q91YI0	ARLY_MOUSE		11.6	464	51740	Argininosuccinate lyase OS=Mus musculus GN=Asl PE=1 SV=1	11	11	1	0	0	2	1	3	5	0	0	2	1	3	5	0	0	2	1	3	5		0	0	1.93424	1.01971	2.86351	4.84966
266	1	Q91Z53	GRHPR_MOUSE		28	328	35330	Glyoxylate reductase/hydroxypyruvate reductase OS=Mus musculus GN=Grhpr PE=1 SV=1	24	24	1	4	0	9	2	4	5	4	0	9	2	4	5	4	0	9	2	4	5		6.47598	0	8.70406	2.03943	3.81801	4.84966
267	1	Q921H8	THIKA_MOUSE		15.3	424	43954	3-ketoacyl-CoA thiolase A, peroxisomal OS=Mus musculus GN=Acaa1a PE=1 SV=1	6	1	0.167	0	0	0	3	2	1	0	0	0	1	0	0	0	0	0	1.5	0	0.5	Q8VCH0, Q921H8	0	0	0	1.52957	0	0.484966
268	1	Q921I1	TRFE_MOUSE		30.8	697	76725	Serotransferrin OS=Mus musculus GN=Tf PE=1 SV=1	39	39	1	1	0	15	9	9	5	1	0	15	9	9	5	1	0	15	9	9	5		1.619	0	14.5068	9.17743	8.59052	4.84966
269	1	Q922B1	MACD1_MOUSE		10.2	323	35296	O-acetyl-ADP-ribose deacetylase MACROD1 OS=Mus musculus GN=Macrod1 PE=1 SV=2	4	4	1	0	0	0	1	1	2	0	0	0	1	1	2	0	0	0	1	1	2		0	0	0	1.01971	0.954502	1.93986
270	1	Q922U2	K2C5_MOUSE		15.2	580	61768	Keratin, type II cytoskeletal 5 OS=Mus musculus GN=Krt5 PE=1 SV=1	36	0	0	6	25	1	1	2	1	0	0	0	0	0	0	0.667	1	0	0	0.333	0	CONT_049, CONT_064, CONT_070, CONT_073, CONT_079, CONT_088, CONT_089, CONT_102, CONT_129, CONT_133, P04104, P11679, Q3TTY5, Q3UV17, Q6IFZ6, Q6IME9, Q6NXH9, Q8BGZ7, Q922U2	1.07987	5.80271	0	0	0.317849	0
271	1	Q923D2	BLVRB_MOUSE		51.5	206	22198	Flavin reductase (NADPH) OS=Mus musculus GN=Blvrb PE=1 SV=3	40	40	1	2	0	11	6	10	11	2	0	11	6	10	11	2	0	11	6	10	11		3.23799	0	10.6383	6.11829	9.54502	10.6693
272	1	Q99020	ROAA_MOUSE		8.4	285	30832	Heterogeneous nuclear ribonucleoprotein A/B OS=Mus musculus GN=Hnrnpab PE=1 SV=1	3	3	1	0	0	0	2	1	0	0	0	0	2	1	0	0	0	0	2	1	0		0	0	0	2.03943	0.954502	0
273	1	Q99J08	S14L2_MOUSE		38.7	403	46301	SEC14-like protein 2 OS=Mus musculus GN=Sec14l2 PE=1 SV=1	25	25	1	0	0	11	4	5	5	0	0	11	4	5	5	0	0	11	4	5	5		0	0	10.6383	4.07886	4.77251	4.84966
274	1	Q99J99	THTM_MOUSE		40.4	297	33024	3-mercaptopyruvate sulfurtransferase OS=Mus musculus GN=Mpst PE=1 SV=3	32	32	1	0	0	12	3	12	5	0	0	12	3	12	5	0	0	12	3	12	5		0	0	11.6054	3.05914	11.454	4.84966
275	1	Q99JB2	STML2_MOUSE		4.2	353	38386	Stomatin-like protein 2, mitochondrial OS=Mus musculus GN=Stoml2 PE=1 SV=1	4	4	1	0	0	0	2	2	0	0	0	0	2	2	0	0	0	0	2	2	0		0	0	0	2.03943	1.909	0
276	1	Q99JT9	MTND_MOUSE		26.3	179	21525	1,2-dihydroxy-3-keto-5-methylthiopentene dioxygenase OS=Mus musculus GN=Adi1 PE=1 SV=1	10	10	1	1	0	4	1	2	2	1	0	4	1	2	2	1	0	4	1	2	2		1.619	0	3.86847	1.01971	1.909	1.93986
277	1	Q99K51	PLST_MOUSE		7.6	630	70743	Plastin-3 OS=Mus musculus GN=Pls3 PE=1 SV=3	4	4	1	0	0	1	1	0	2	0	0	1	1	0	2	0	0	1	1	0	2		0	0	0.967118	1.01971	0	1.93986
278	1	Q99KB8	GLO2_MOUSE		33.7	309	34085	Hydroxyacylglutathione hydrolase, mitochondrial OS=Mus musculus GN=Hagh PE=1 SV=2	73	73	1	23	0	18	13	9	10	23	0	18	13	9	10	23	0	18	13	9	10		37.2369	0	17.4081	13.2563	8.59052	9.69932
279	1	Q99KI0	ACON_MOUSE		26.2	780	85465	Aconitate hydratase, mitochondrial OS=Mus musculus GN=Aco2 PE=1 SV=1	72	72	1	7	0	22	5	15	23	7	0	22	5	15	23	7	0	22	5	15	23		11.333	0	21.2766	5.09857	14.3175	22.3084
280	1	Q99KR3	LACB2_MOUSE		10.4	288	32755	Beta-lactamase-like protein 2 OS=Mus musculus GN=Lactb2 PE=1 SV=1	2	2	1	0	0	2	0	0	0	0	0	2	0	0	0	0	0	2	0	0	0		0	0	1.93424	0	0	0
281	1	Q99KR7	PPIF_MOUSE		28.6	206	21738	Peptidyl-prolyl cis-trans isomerase F, mitochondrial OS=Mus musculus GN=Ppif PE=1 SV=1	61	61	1	14	0	12	11	13	11	14	0	12	11	13	11	14	0	12	11	13	11		22.6659	0	11.6054	11.2169	12.4085	10.6693
282	1	Q99LB7	SARDH_MOUSE		13.3	919	101683	Sarcosine dehydrogenase, mitochondrial OS=Mus musculus GN=Sardh PE=1 SV=1	14	14	1	0	0	3	2	2	7	0	0	3	2	2	7	0	0	3	2	2	7		0	0	2.90135	2.03943	1.909	6.78952
283	1	Q99LC5	ETFA_MOUSE		19.2	333	35010	Electron transfer flavoprotein subunit alpha, mitochondrial OS=Mus musculus GN=Etfa PE=1 SV=2	15	15	1	0	0	0	9	4	2	0	0	0	9	4	2	0	0	0	9	4	2		0	0	0	9.17743	3.81801	1.93986
284	1	Q99LX0	PARK7_MOUSE		43.9	189	20022	Protein deglycase DJ-1 OS=Mus musculus GN=Park7 PE=1 SV=1	14	14	1	2	0	4	1	3	4	2	0	4	1	3	4	2	0	4	1	3	4		3.23799	0	3.86847	1.01971	2.86351	3.87973
285	1	Q99M51	NCK1_MOUSE		8.8	377	42892	Cytoplasmic protein NCK1 OS=Mus musculus GN=Nck1 PE=1 SV=1	4	3	0.75	0	0	3	1	0	0	0	0	2	1	0	0	0	0	2.667	1	0	0	O55033, Q99M51	0	0	2.5793	1.01971	0	0
286	1	Q99P30	NUDT7_MOUSE		16.5	236	26858	Peroxisomal coenzyme A diphosphatase NUDT7 OS=Mus musculus GN=Nudt7 PE=1 SV=2	6	6	1	0	0	3	1	0	2	0	0	3	1	0	2	0	0	3	1	0	2		0	0	2.90135	1.01971	0	1.93986
287	1	Q99PL5	RRBP1_MOUSE		11.7	1605	172880	Ribosome-binding protein 1 OS=Mus musculus GN=Rrbp1 PE=1 SV=2	10	10	1	2	3	4	0	1	0	2	3	4	0	1	0	2	3	4	0	1	0		3.23799	17.4081	3.86847	0	0.954502	0
288	1	Q9CPT4	MYDGF_MOUSE		21.7	166	17983	Myeloid-derived growth factor OS=Mus musculus GN=Mydgf PE=1 SV=1	7	7	1	1	0	1	5	0	0	1	0	1	5	0	0	1	0	1	5	0	0		1.619	0	0.967118	5.09857	0	0
289	1	Q9CPU0	LGUL_MOUSE		36.4	184	20811	Lactoylglutathione lyase OS=Mus musculus GN=Glo1 PE=1 SV=3	17	17	1	5	0	9	1	1	1	5	0	9	1	1	1	5	0	9	1	1	1		8.09498	0	8.70406	1.01971	0.954502	0.969932
290	1	Q9CQI6	COTL1_MOUSE		33.1	142	15945	Coactosin-like protein OS=Mus musculus GN=Cotl1 PE=1 SV=3	3	3	1	0	0	1	2	0	0	0	0	1	2	0	0	0	0	1	2	0	0		0	0	0.967118	2.03943	0	0
291	1	Q9CQM5	TXD17_MOUSE		23.6	123	14016	Thioredoxin domain-containing protein 17 OS=Mus musculus GN=Txndc17 PE=1 SV=1	4	4	1	2	0	2	0	0	0	2	0	2	0	0	0	2	0	2	0	0	0		3.23799	0	1.93424	0	0	0
292	1	Q9CR09	UFC1_MOUSE		13.2	167	19482	Ubiquitin-fold modifier-conjugating enzyme 1 OS=Mus musculus GN=Ufc1 PE=1 SV=1	2	2	1	0	0	0	2	0	0	0	0	0	2	0	0	0	0	0	2	0	0		0	0	0	2.03943	0	0
293	1	Q9CR35	CTRB1_MOUSE		15.2	263	27823	Chymotrypsinogen B OS=Mus musculus GN=Ctrb1 PE=1 SV=1	3	3	1	2	0	0	0	0	1	2	0	0	0	0	1	2	0	0	0	0	1		3.23799	0	0	0	0	0.969932
294	1	Q9CRB3	HIUH_MOUSE		19.5	118	13560	5-hydroxyisourate hydrolase OS=Mus musculus GN=Urah PE=1 SV=1	2	2	1	0	0	2	0	0	0	0	0	2	0	0	0	0	0	2	0	0	0		0	0	1.93424	0	0	0
295	1	Q9CXN7	PBLD2_MOUSE		44.8	288	31984	Phenazine biosynthesis-like domain-containing protein 2 OS=Mus musculus GN=Pbld2 PE=1 SV=1	48	9	0.188	8	0	12	10	11	7	1	0	3	1	3	1	1.583	0	5.7	3.25	7.8	2	Q9CXN7, Q9DCG6	2.56287	0	5.51257	3.31407	7.44512	1.93986
296	1	Q9CY64	BIEA_MOUSE		13.9	295	33526	Biliverdin reductase A OS=Mus musculus GN=Blvra PE=1 SV=1	4	4	1	0	0	2	0	1	1	0	0	2	0	1	1	0	0	2	0	1	1		0	0	1.93424	0	0.954502	0.969932
297	1	Q9CYW4	HDHD3_MOUSE		27.9	251	28028	Haloacid dehalogenase-like hydrolase domain-containing protein 3 OS=Mus musculus GN=Hdhd3 PE=1 SV=1	14	14	1	0	0	1	4	7	2	0	0	1	4	7	2	0	0	1	4	7	2		0	0	0.967118	4.07886	6.68151	1.93986
298	1	Q9CZ44	NSF1C_MOUSE		7.6	370	40711	NSFL1 cofactor p47 OS=Mus musculus GN=Nsfl1c PE=1 SV=1	5	5	1	0	0	3	1	1	0	0	0	3	1	1	0	0	0	3	1	1	0		0	0	2.90135	1.01971	0.954502	0
299	1	Q9CZY3	UB2V1_MOUSE		15	147	16356	Ubiquitin-conjugating enzyme E2 variant 1 OS=Mus musculus GN=Ube2v1 PE=1 SV=1	6	5	0.833	0	0	2	1	1	2	0	0	2	1	1	1	0	0	2	1	1	1.333	Q9CZY3, Q9D2M8	0	0	1.93424	1.01971	0.954502	1.29292
300	1	Q9D0F9	PGM1_MOUSE		43.8	562	61419	Phosphoglucomutase-1 OS=Mus musculus GN=Pgm1 PE=1 SV=4	101	93	0.921	21	0	24	17	20	19	20	0	22	16	18	17	21	0	24	17	20	18.889	Q8BZF8, Q9D0F9	33.9989	0	23.2108	17.3351	19.09	18.321
301	1	Q9D172	ES1_MOUSE		27.4	266	28091	ES1 protein homolog, mitochondrial OS=Mus musculus GN=D10Jhu81e PE=1 SV=1	13	13	1	0	0	2	2	5	4	0	0	2	2	5	4	0	0	2	2	5	4		0	0	1.93424	2.03943	4.77251	3.87973
302	1	Q9D2M8	UB2V2_MOUSE		15.2	145	16368	Ubiquitin-conjugating enzyme E2 variant 2 OS=Mus musculus GN=Ube2v2 PE=1 SV=4	6	5	0.833	0	0	1	2	0	3	0	0	1	2	0	2	0	0	1	2	0	2.667	Q9CZY3, Q9D2M8	0	0	0.967118	2.03943	0	2.58681
303	1	Q9D358	PPAC_MOUSE		24.1	158	18193	Low molecular weight phosphotyrosine protein phosphatase OS=Mus musculus GN=Acp1 PE=1 SV=3	14	14	1	0	0	4	4	3	3	0	0	4	4	3	3	0	0	4	4	3	3		0	0	3.86847	4.07886	2.86351	2.9098
304	1	Q9D6Y7	MSRA_MOUSE		34.8	233	25989	Mitochondrial peptide methionine sulfoxide reductase OS=Mus musculus GN=Msra PE=1 SV=1	37	37	1	0	0	7	9	12	9	0	0	7	9	12	9	0	0	7	9	12	9		0	0	6.76983	9.17743	11.454	8.72939
305	1	Q9D711	PIR_MOUSE		24.1	290	32067	Pirin OS=Mus musculus GN=Pir PE=1 SV=1	13	13	1	0	0	3	3	4	3	0	0	3	3	4	3	0	0	3	3	4	3		0	0	2.90135	3.05914	3.81801	2.9098
306	1	Q9D967	MGDP1_MOUSE		18.3	164	18583	Magnesium-dependent phosphatase 1 OS=Mus musculus GN=Mdp1 PE=1 SV=1	5	5	1	0	0	0	2	0	3	0	0	0	2	0	3	0	0	0	2	0	3		0	0	0	2.03943	0	2.9098
307	1	Q9DBA8	HUTI_MOUSE		11	426	46490	Probable imidazolonepropionase OS=Mus musculus GN=Amdhd1 PE=1 SV=1	5	5	1	0	0	4	0	1	0	0	0	4	0	1	0	0	0	4	0	1	0		0	0	3.86847	0	0.954502	0
308	1	Q9DBF1	AL7A1_MOUSE		23.4	539	58862	Alpha-aminoadipic semialdehyde dehydrogenase OS=Mus musculus GN=Aldh7a1 PE=1 SV=4	18	18	1	2	0	8	2	4	2	2	0	8	2	4	2	2	0	8	2	4	2		3.23799	0	7.73694	2.03943	3.81801	1.93986
309	1	Q9DBG3	AP2B1_MOUSE		2.9	937	104584	AP-2 complex subunit beta OS=Mus musculus GN=Ap2b1 PE=1 SV=1	2	1	0.5	0	0	0	0	2	0	0	0	0	0	1	0	0	0	0	0	1.5	0	O35643, Q9DBG3	0	0	0	0	1.43175	0
310	1	Q9DBJ1	PGAM1_MOUSE		25.6	254	28833	Phosphoglycerate mutase 1 OS=Mus musculus GN=Pgam1 PE=1 SV=3	6	6	1	0	0	4	0	0	2	0	0	4	0	0	2	0	0	4	0	0	2		0	0	3.86847	0	0	1.93986
311	1	Q9DBP5	KCY_MOUSE		24	196	22166	UMP-CMP kinase OS=Mus musculus GN=Cmpk1 PE=1 SV=1	20	20	1	0	0	7	4	4	5	0	0	7	4	4	5	0	0	7	4	4	5		0	0	6.76983	4.07886	3.81801	4.84966
312	1	Q9DBT9	M2GD_MOUSE		14.5	869	97256	Dimethylglycine dehydrogenase, mitochondrial OS=Mus musculus GN=Dmgdh PE=1 SV=1	24	24	1	5	0	3	2	8	6	5	0	3	2	8	6	5	0	3	2	8	6		8.09498	0	2.90135	2.03943	7.63602	5.81959
313	1	Q9DCG6	PBLD1_MOUSE		53.8	288	32049	Phenazine biosynthesis-like domain-containing protein 1 OS=Mus musculus GN=Pbld1 PE=1 SV=2	67	28	0.418	18	0	16	12	10	11	11	0	7	3	2	5	17.417	0	13.3	9.75	5.2	10	Q9CXN7, Q9DCG6	28.1981	0	12.8627	9.94222	4.96341	9.69932
314	1	Q9DCL9	PUR6_MOUSE		3.1	425	47007	Multifunctional protein ADE2 OS=Mus musculus GN=Paics PE=1 SV=4	9	9	1	0	0	4	3	1	1	0	0	4	3	1	1	0	0	4	3	1	1		0	0	3.86847	3.05914	0.954502	0.969932
315	1	Q9DCM2	GSTK1_MOUSE		49.6	226	25705	Glutathione S-transferase kappa 1 OS=Mus musculus GN=Gstk1 PE=1 SV=3	42	42	1	0	0	6	8	15	13	0	0	6	8	15	13	0	0	6	8	15	13		0	0	5.80271	8.15772	14.3175	12.6091
316	1	Q9DCS3	MECR_MOUSE		8.3	373	40344	Trans-2-enoyl-CoA reductase, mitochondrial OS=Mus musculus GN=Mecr PE=1 SV=2	11	11	1	0	0	0	5	3	3	0	0	0	5	3	3	0	0	0	5	3	3		0	0	0	5.09857	2.86351	2.9098
317	1	Q9DCT1	AKCL2_MOUSE		39.2	301	34462	1,5-anhydro-D-fructose reductase OS=Mus musculus GN=Akr1e2 PE=1 SV=1	18	9	0.5	6	0	7	1	3	1	4	0	4	0	0	1	5	0	4.48	0	0	1	Q9DCT1, Q9JII6	8.09498	0	4.33269	0	0	0.969932
318	1	Q9DCV4	RMD1_MOUSE		18	305	35001	Regulator of microtubule dynamics protein 1 OS=Mus musculus GN=Rmdn1 PE=1 SV=2	14	14	1	0	0	0	8	3	3	0	0	0	8	3	3	0	0	0	8	3	3		0	0	0	8.15772	2.86351	2.9098
319	1	Q9DCW4	ETFB_MOUSE		29	255	27624	Electron transfer flavoprotein subunit beta OS=Mus musculus GN=Etfb PE=1 SV=3	21	21	1	0	0	1	12	3	5	0	0	1	12	3	5	0	0	1	12	3	5		0	0	0.967118	12.2366	2.86351	4.84966
320	1	Q9ERG0	LIMA1_MOUSE		2.9	753	84061	LIM domain and actin-binding protein 1 OS=Mus musculus GN=Lima1 PE=1 SV=3	3	3	1	0	0	1	2	0	0	0	0	1	2	0	0	0	0	1	2	0	0		0	0	0.967118	2.03943	0	0
321	1	Q9JHW2	NIT2_MOUSE		55.8	276	30503	Omega-amidase NIT2 OS=Mus musculus GN=Nit2 PE=1 SV=1	27	27	1	5	0	7	4	6	5	5	0	7	4	6	5	5	0	7	4	6	5		8.09498	0	6.76983	4.07886	5.72701	4.84966
322	1	Q9JI75	NQO2_MOUSE		36.8	231	26249	Ribosyldihydronicotinamide dehydrogenase [quinone] OS=Mus musculus GN=Nqo2 PE=1 SV=3	16	16	1	4	0	6	1	2	3	4	0	6	1	2	3	4	0	6	1	2	3		6.47598	0	5.80271	1.01971	1.909	2.9098
323	1	Q9JII6	AK1A1_MOUSE		52.3	325	36588	Alcohol dehydrogenase [NADP(+)] OS=Mus musculus GN=Akr1a1 PE=1 SV=3	66	57	0.864	6	0	24	9	17	10	4	0	21	8	14	10	5	0	23.52	9	17	10	Q9DCT1, Q9JII6	8.09498	0	22.7466	9.17743	16.2265	9.69932
324	1	Q9JIL4	NHRF3_MOUSE		6.7	519	56500	Na(+)/H(+) exchange regulatory cofactor NHE-RF3 OS=Mus musculus GN=Pdzk1 PE=1 SV=1	5	5	1	0	0	2	1	1	1	0	0	2	1	1	1	0	0	2	1	1	1		0	0	1.93424	1.01971	0.954502	0.969932
325	1	Q9JJU8	SH3L1_MOUSE		68.4	114	12812	SH3 domain-binding glutamic acid-rich-like protein OS=Mus musculus GN=Sh3bgrl PE=1 SV=1	18	18	1	6	0	9	2	0	1	6	0	9	2	0	1	6	0	9	2	0	1		9.71398	0	8.70406	2.03943	0	0.969932
326	1	Q9JMD3	PCTL_MOUSE		33	291	32952	PCTP-like protein OS=Mus musculus GN=Stard10 PE=1 SV=1	19	19	1	0	0	4	7	3	5	0	0	4	7	3	5	0	0	4	7	3	5		0	0	3.86847	7.138	2.86351	4.84966
327	1	Q9QUH0	GLRX1_MOUSE		37.4	107	11872	Glutaredoxin-1 OS=Mus musculus GN=Glrx PE=1 SV=3	29	29	1	1	0	7	6	9	6	1	0	7	6	9	6	1	0	7	6	9	6		1.619	0	6.76983	6.11829	8.59052	5.81959
328	1	Q9QXD6	F16P1_MOUSE		36.4	338	36913	Fructose-1,6-bisphosphatase 1 OS=Mus musculus GN=Fbp1 PE=1 SV=3	32	32	1	5	0	13	7	3	4	5	0	13	7	3	4	5	0	13	7	3	4		8.09498	0	12.5725	7.138	2.86351	3.87973
329	1	Q9QXF8	GNMT_MOUSE		30.7	293	32676	Glycine N-methyltransferase OS=Mus musculus GN=Gnmt PE=1 SV=3	24	24	1	5	0	11	2	4	2	5	0	11	2	4	2	5	0	11	2	4	2		8.09498	0	10.6383	2.03943	3.81801	1.93986
330	1	Q9QXY6	EHD3_MOUSE		8.4	535	60822	EH domain-containing protein 3 OS=Mus musculus GN=Ehd3 PE=1 SV=2	6	6	1	0	0	1	1	3	1	0	0	1	1	3	1	0	0	1	1	3	1		0	0	0.967118	1.01971	2.86351	0.969932
331	1	Q9QY76	VAPB_MOUSE		10.7	243	26947	Vesicle-associated membrane protein-associated protein B OS=Mus musculus GN=Vapb PE=1 SV=3	7	3	0.429	0	0	0	3	2	2	0	0	0	1	1	1	0	0	0	1.5	1.333	1.5	Q9QY76, Q9WV55	0	0	0	1.52957	1.27235	1.4549
332	1	Q9QYR7	ACOT3_MOUSE		7.9	432	47491	Acyl-coenzyme A thioesterase 3 OS=Mus musculus GN=Acot3 PE=1 SV=1	5	5	1	0	0	0	0	3	2	0	0	0	0	3	2	0	0	0	0	3	2		0	0	0	0	2.86351	1.93986
333	1	Q9R0P5	DEST_MOUSE		24.2	165	18523	Destrin OS=Mus musculus GN=Dstn PE=1 SV=3	12	12	1	0	0	1	6	2	3	0	0	1	6	2	3	0	0	1	6	2	3		0	0	0.967118	6.11829	1.909	2.9098
334	1	Q9R257	HEBP1_MOUSE		38.4	190	21068	Heme-binding protein 1 OS=Mus musculus GN=Hebp1 PE=1 SV=2	31	31	1	0	0	15	1	7	8	0	0	15	1	7	8	0	0	15	1	7	8		0	0	14.5068	1.01971	6.68151	7.75946
335	1	Q9WTP6	KAD2_MOUSE		28.9	239	26470	Adenylate kinase 2, mitochondrial OS=Mus musculus GN=Ak2 PE=1 SV=5	16	16	1	0	0	1	6	7	2	0	0	1	6	7	2	0	0	1	6	7	2		0	0	0.967118	6.11829	6.68151	1.93986
336	1	Q9WTP7	KAD3_MOUSE		35.2	227	25427	GTP:AMP phosphotransferase AK3, mitochondrial OS=Mus musculus GN=Ak3 PE=1 SV=3	32	32	1	0	0	2	12	10	8	0	0	2	12	10	8	0	0	2	12	10	8		0	0	1.93424	12.2366	9.54502	7.75946
337	1	Q9WUK2	IF4H_MOUSE		10.9	248	27342	Eukaryotic translation initiation factor 4H OS=Mus musculus GN=Eif4h PE=1 SV=3	7	7	1	1	0	2	2	1	1	1	0	2	2	1	1	1	0	2	2	1	1		1.619	0	1.93424	2.03943	0.954502	0.969932
338	1	Q9WV55	VAPA_MOUSE		11.2	249	27856	Vesicle-associated membrane protein-associated protein A OS=Mus musculus GN=Vapa PE=1 SV=2	10	6	0.6	0	0	0	5	3	2	0	0	0	3	2	1	0	0	0	4.5	2.667	1.5	Q9QY76, Q9WV55	0	0	0	4.58872	2.54566	1.4549
339	1	Q9WVA4	TAGL2_MOUSE		36.7	199	22396	Transgelin-2 OS=Mus musculus GN=Tagln2 PE=1 SV=4	16	16	1	0	0	2	6	5	3	0	0	2	6	5	3	0	0	2	6	5	3		0	0	1.93424	6.11829	4.77251	2.9098
340	1	Q9WVK4	EHD1_MOUSE		11.6	534	60604	EH domain-containing protein 1 OS=Mus musculus GN=Ehd1 PE=1 SV=1	3	3	1	0	0	0	1	2	0	0	0	0	1	2	0	0	0	0	1	2	0		0	0	0	1.01971	1.909	0
341	1	Q9WVL0	MAAI_MOUSE		20.4	216	24276	Maleylacetoacetate isomerase OS=Mus musculus GN=Gstz1 PE=1 SV=1	7	7	1	1	0	1	0	1	4	1	0	1	0	1	4	1	0	1	0	1	4		1.619	0	0.967118	0	0.954502	3.87973
342	1	Q9Z0J0	NPC2_MOUSE		24.8	149	16443	Epididymal secretory protein E1 OS=Mus musculus GN=Npc2 PE=1 SV=1	19	19	1	3	0	3	6	4	3	3	0	3	6	4	3	3	0	3	6	4	3		4.85699	0	2.90135	6.11829	3.81801	2.9098
343	1	Q9Z1D1	EIF3G_MOUSE		7.8	320	35639	Eukaryotic translation initiation factor 3 subunit G OS=Mus musculus GN=Eif3g PE=1 SV=2	4	4	1	0	0	2	1	0	1	0	0	2	1	0	1	0	0	2	1	0	1		0	0	1.93424	1.01971	0	0.969932
344	1	Q9Z2I8	SUCB2_MOUSE		7.2	433	46841	Succinyl-CoA ligase [GDP-forming] subunit beta, mitochondrial OS=Mus musculus GN=Suclg2 PE=1 SV=3	9	9	1	0	0	1	2	2	4	0	0	1	2	2	4	0	0	1	2	2	4		0	0	0.967118	2.03943	1.909	3.87973
345	1	Q9Z2M7	PMM2_MOUSE		10.3	242	27658	Phosphomannomutase 2 OS=Mus musculus GN=Pmm2 PE=1 SV=1	3	3	1	0	0	2	0	0	1	0	0	2	0	0	1	0	0	2	0	0	1		0	0	1.93424	0	0	0.969932
Per Sample Total Spectral Count:												1853	517	3102	2942	3143	3093
Per Sample Total Contaminant Count:												226	376	117	205	151	93
Per sample normalization factors:												1	1	1	1	1	1
valid_protein_count	valid_reversed											1.619	5.80271	0.967118	1.01971	0.954502	0.969932
345	9
reject_protein_count	reject_reversed
48	7
Protein report of Spectral Count values performed on Fri Sep 02 12:00:23 2016
Database: sprot_2016.06_mouse_both.fasta (33946 entries)
FALSE	use_samples_list flag
FALSE	calc_ms2_int flag
50	max_num_peaks
FALSE	normalize_counts flag
FALSE	full_peptide_list flag
FALSE	multiple_charge_states_ok flag
TRUE	modifications_ok flag
2	minimum_ntt_per_peptide
2	minimum_peptide_per_protein
0	minimum_unique_per_protein
FALSE	icat_sample flag
FALSE	allow_prot_nterm_acytl flag
