# Supplementary material for: Altered zinc balance in the Atp7b−/− mouse reveals a mechanism of copper toxicity in Wilson disease
Source: Royal Society of Chemistry journal article supplement (doi:10.1039/c8mt00199e), 2018-01-01
Supplement: c8mt00199e3.pdf [file c8mt00199e3.pdf]

**Table S3: Summary of RNA-seq data mapping to reference genome**

|                                    | <b>Sample</b> | <b>Sample ID</b> | <b>Sex</b> | <b>read count</b> | <b>Uniquely mapped reads number</b> | <b>Number of reads mapped to multiple loci</b> | <b>total mapped reads</b> | <b>% mapped reads</b> |
|------------------------------------|---------------|------------------|------------|-------------------|-------------------------------------|------------------------------------------------|---------------------------|-----------------------|
| WT ( <i>Atp7b</i> <sup>+/+</sup> ) | 1             | WT614M_idx12*    | male       | 36360686          | 26981727                            | 4679367                                        | 31661094                  | 87.1                  |
|                                    | 2             | WT2_wild_type    | female     | 15823058          | 13767853                            | 1578894                                        | 15346747                  | 97                    |
|                                    | 3             | WT3_wild_type    | female     | 8149631           | 6698957                             | 1007821                                        | 7706778                   | 94.6                  |
| KO ( <i>Atp7b</i> <sup>-/-</sup> ) | 1             | ATP7B_1_K0204    | male       | 22931967          | 18941053                            | 2895805                                        | 21836858                  | 95.2                  |
|                                    | 2             | ATP7B_1_K0243    | male       | 9538147           | 7676801                             | 1403163                                        | 9079964                   | 95.2                  |
|                                    | 3             | KO620F_idx12*    | female     | 38366743          | 30150835                            | 4862158                                        | 35012993                  | 91.3                  |

\*paired-end runs

*Reads were mapped to Mus musculus genome assembly GRCm38*
