# Supplementary material for: Altered zinc balance in the Atp7b−/− mouse reveals a mechanism of copper toxicity in Wilson disease
Source: Royal Society of Chemistry journal article supplement (doi:10.1039/c8mt00199e), 2018-01-01
Supplement: c8mt00199e4.xlsx [file c8mt00199e4.xlsx]

## Sheet: TS2
Table S4: List of Differentially expressed (DE) genes for the KO vs WT comparison. Genes with FDR corrected p-value<0.05 were considered DE.
GeneID	Length	Symbol	logFC	PValue	FDR
ENSMUSG00000001986	9859	Gria3	3.68609	7.12076e-08	0.000461093
ENSMUSG00000022346	2767	Myc	-3.25113	9.47181e-08	0.000461093
ENSMUSG00000039801	13017	2410089E03Rik	5.07585	1.26223e-07	0.000461093
ENSMUSG00000027323	6649	Rad51	4.86593	1.48405e-07	0.000461093
ENSMUSG00000041219	5332	Arhgap11a	3.76732	2.57091e-07	0.000639026
ENSMUSG00000037313	3551	Tacc3	3.50576	4.35637e-07	0.000775855
ENSMUSG00000032122	5079	Slc37a2	3.24572	4.36996e-07	0.000775855
ENSMUSG00000030641	3349	4632434I11Rik	5.35069	7.28991e-07	0.00103515
ENSMUSG00000006398	1868	Cdc20	4.66868	1.03638e-06	0.00103515
ENSMUSG00000090942	3297	F830016B08Rik	-3.06462	1.04568e-06	0.00103515
ENSMUSG00000002055	5624	Spag5	5.07789	1.097e-06	0.00103515
ENSMUSG00000034773	3032	BC030867	4.69418	1.10846e-06	0.00103515
ENSMUSG00000024388	6621	Myo7b	4.78889	1.17838e-06	0.00103515
ENSMUSG00000024795	5563	Kif20b	3.97229	1.36532e-06	0.00103515
ENSMUSG00000030254	5796	Rad18	3.17249	1.36603e-06	0.00103515
ENSMUSG00000032400	4283	Zwilch	3.697	1.45553e-06	0.00103515
ENSMUSG00000015880	7061	Ncapg	5.56485	1.4942e-06	0.00103515
ENSMUSG00000002835	3308	Chaf1a	2.97588	1.64017e-06	0.00103515
ENSMUSG00000021208	1093	Ifi27l2b	3.95268	1.71198e-06	0.00103515
ENSMUSG00000020415	2000	Pttg1	3.32037	1.72639e-06	0.00103515
ENSMUSG00000022322	2132	Shcbp1	5.31877	1.74912e-06	0.00103515
ENSMUSG00000028312	5478	Smc2	2.44766	1.92296e-06	0.00106147
ENSMUSG00000029910	2203	Mad2l1	3.22804	1.96442e-06	0.00106147
ENSMUSG00000040084	4275	Bub1b	3.88555	2.09163e-06	0.00108312
ENSMUSG00000037544	6650	Dlgap5	4.01234	2.2568e-06	0.00110339
ENSMUSG00000031762	556	Mt2	3.9837	2.4546e-06	0.00110339
ENSMUSG00000039720	1355	Got1l1	6.47838	2.51456e-06	0.00110339
ENSMUSG00000021569	2267	Trip13	3.51839	2.638e-06	0.00110339
ENSMUSG00000027331	5158	Knstrn	3.45079	2.6866e-06	0.00110339
ENSMUSG00000017716	3402	Birc5	4.10075	2.7174e-06	0.00110339
ENSMUSG00000027699	5202	Ect2	4.07148	2.75226e-06	0.00110339
ENSMUSG00000028614	4924	Ndc1	1.88925	2.87609e-06	0.001117
ENSMUSG00000034206	9685	Polq	5.28849	3.15377e-06	0.00116666
ENSMUSG00000033031	5688	C330027C09Rik	3.3173	3.23563e-06	0.00116666
ENSMUSG00000086813	1939	Gm13657	5.03948	3.28557e-06	0.00116666
ENSMUSG00000030364	2160	Clec2h	-9.27224	3.59905e-06	0.00123362
ENSMUSG00000068744	3012	Psrc1	6.44345	3.67268e-06	0.00123362
ENSMUSG00000027469	4677	Tpx2	3.84016	4.69172e-06	0.0014771
ENSMUSG00000023015	7079	Racgap1	3.33691	4.71631e-06	0.0014771
ENSMUSG00000034906	4307	Ncaph	3.21773	4.75412e-06	0.0014771
ENSMUSG00000019942	3445	Cdk1	4.03068	4.9536e-06	0.00150155
ENSMUSG00000035310	5820	Lin54	1.85197	5.09653e-06	0.00150809
ENSMUSG00000058290	6630	Espl1	3.72145	5.35894e-06	0.00154886
ENSMUSG00000001403	2600	Ube2c	3.4346	5.61428e-06	0.00158578
ENSMUSG00000023345	2995	Poc1a	2.47136	6.26769e-06	0.00172328
ENSMUSG00000034349	5032	Smc4	1.91283	6.37843e-06	0.00172328
ENSMUSG00000029177	2503	Cenpa	2.40616	6.83802e-06	0.00180815
ENSMUSG00000038379	4919	Ttk	5.03646	7.00461e-06	0.00181361
ENSMUSG00000024301	2627	Kifc5b	4.1609	7.77076e-06	0.00194051
ENSMUSG00000030609	5687	Aen	1.84028	7.807e-06	0.00194051
ENSMUSG00000076437	1131	2700094K13Rik	2.26427	8.1024e-06	0.00195367
ENSMUSG00000098090	2181	2700099C18Rik	4.2928	8.17437e-06	0.00195367
ENSMUSG00000039231	5270	Suv39h1	2.0424	8.69011e-06	0.00203775
ENSMUSG00000051378	3572	Kif18b	4.05921	9.40712e-06	0.00216503
ENSMUSG00000023886	2832	Smoc2	1.96342	1.03807e-05	0.00234566
ENSMUSG00000028718	5795	Stil	4.86888	1.0715e-05	0.00237797
ENSMUSG00000037466	3353	4930427A07Rik	3.57995	1.1517e-05	0.00251112
ENSMUSG00000023067	2223	Cdkn1a	5.31595	1.18044e-05	0.00252939
ENSMUSG00000047757	2983	Fancb	3.20127	1.23189e-05	0.00254751
ENSMUSG00000022033	1791	Pbk	4.91596	1.23874e-05	0.00254751
ENSMUSG00000020326	3512	Ccng1	2.14143	1.25039e-05	0.00254751
ENSMUSG00000027635	3354	Dsn1	2.9488	1.2895e-05	0.00258483
ENSMUSG00000061533	11591	Cep128	2.49018	1.51654e-05	0.00288649
ENSMUSG00000075266	1510	Cenpw	3.69729	1.52634e-05	0.00288649
ENSMUSG00000022385	2721	Gtse1	4.30979	1.52905e-05	0.00288649
ENSMUSG00000024791	2129	Cdca5	4.44178	1.5329e-05	0.00288649
ENSMUSG00000036678	1816	Aaas	2.04124	1.57193e-05	0.00290412
ENSMUSG00000049493	3890	Pls1	2.51966	1.61545e-05	0.00290412
ENSMUSG00000038541	854	Srd5a2	4.45787	1.61592e-05	0.00290412
ENSMUSG00000024056	2201	Ndc80	4.84135	1.64598e-05	0.00290412
ENSMUSG00000032586	2697	Traip	4.51437	1.65909e-05	0.00290412
ENSMUSG00000028457	6473	Atp8b5	3.54984	1.87707e-05	0.00324002
ENSMUSG00000021418	6540	Rpp40	2.10758	2.08381e-05	0.0034936
ENSMUSG00000022408	2988	Fam83f	2.97785	2.11741e-05	0.0034936
ENSMUSG00000025912	5402	Mybl1	4.28414	2.13182e-05	0.0034936
ENSMUSG00000038943	8225	Prc1	2.79708	2.13642e-05	0.0034936
ENSMUSG00000039238	3232	Zfp750	1.86198	2.27671e-05	0.00367467
ENSMUSG00000039842	7806	Mcph1	1.959	2.39516e-05	0.00381629
ENSMUSG00000036181	1560	Hist1h1c	1.9054	2.51515e-05	0.00395674
ENSMUSG00000062510	3387	Nsl1	3.69647	2.63602e-05	0.00409506
ENSMUSG00000031262	5681	Cenpi	4.33431	2.9687e-05	0.00455493
ENSMUSG00000015568	6810	Lpl	2.15324	3.09631e-05	0.0046928
ENSMUSG00000078773	5782	Rad54b	4.07288	3.1354e-05	0.00469479
ENSMUSG00000027201	5936	Myef2	1.67894	3.33225e-05	0.00481204
ENSMUSG00000031886	2699	Ces2e	1.72556	3.35267e-05	0.00481204
ENSMUSG00000034785	1970	Dio1	-1.79518	3.36825e-05	0.00481204
ENSMUSG00000030177	6685	Ccdc77	2.15184	3.36859e-05	0.00481204
ENSMUSG00000036904	3346	Fzd8	-2.56518	3.48557e-05	0.00492257
ENSMUSG00000022978	2863	Mis18a	2.01062	3.58304e-05	0.00497318
ENSMUSG00000027070	16701	Lrp2	2.93801	3.60143e-05	0.00497318
ENSMUSG00000040658	1106	Dnph1	-1.98332	3.66655e-05	0.00499734
ENSMUSG00000044783	8331	Hjurp	1.36776	3.69935e-05	0.00499734
ENSMUSG00000027496	2531	Aurka	2.18289	3.82928e-05	0.00511723
ENSMUSG00000071713	4764	Csf2rb	1.88648	4.30401e-05	0.00569046
ENSMUSG00000034311	5514	Kif4	3.18689	4.45937e-05	0.00581565
ENSMUSG00000026683	2481	Nuf2	3.73221	4.56727e-05	0.00581565
ENSMUSG00000099889	994	RP24-444C13.26	4.28177	4.57184e-05	0.00581565
ENSMUSG00000052957	2961	Gas1	-2.65789	4.58589e-05	0.00581565
ENSMUSG00000020184	5070	Mdm2	1.63266	5.00766e-05	0.0062315
ENSMUSG00000021965	2260	Ska3	4.05083	5.01408e-05	0.0062315
ENSMUSG00000020423	2743	Btg2	1.72422	5.0866e-05	0.00625904
ENSMUSG00000027326	8542	Casc5	3.86637	5.16827e-05	0.00626693
ENSMUSG00000042029	6604	Ncapg2	2.16002	5.19387e-05	0.00626693
ENSMUSG00000056531	4655	Ccdc18	4.22046	5.47782e-05	0.006546
ENSMUSG00000040093	5253	Bmf	-1.91531	5.64968e-05	0.00666086
ENSMUSG00000022021	4584	Diap3	3.53779	5.68113e-05	0.00666086
ENSMUSG00000037725	2601	Ckap2	3.63121	6.00763e-05	0.00697783
ENSMUSG00000079553	3407	Kifc1	3.40843	6.17497e-05	0.00710579
ENSMUSG00000020914	9013	Top2a	2.65326	6.23218e-05	0.00710583
ENSMUSG00000027353	3718	Mcm8	2.7086	6.35761e-05	0.00718294
ENSMUSG00000012519	2303	Mlkl	1.93288	6.42057e-05	0.00718872
ENSMUSG00000028873	5177	Cdca8	2.79407	6.5616e-05	0.00728103
ENSMUSG00000005233	3188	Spc25	2.54834	6.70812e-05	0.0073184
ENSMUSG00000087213	2341	2810408I11Rik	3.67069	6.71305e-05	0.0073184
ENSMUSG00000021697	3350	Depdc1b	3.37443	6.90764e-05	0.00746506
ENSMUSG00000036768	4815	Kif15	3.54131	7.13509e-05	0.00762547
ENSMUSG00000003873	869	Bax	1.35375	7.18929e-05	0.00762547
ENSMUSG00000051220	5302	Ercc6l	3.6139	7.26381e-05	0.00762547
ENSMUSG00000085995	1662	Gm2788	-2.22706	7.30525e-05	0.00762547
ENSMUSG00000042129	6344	Rassf4	1.75579	7.36286e-05	0.00762547
ENSMUSG00000035171	3067	1110059E24Rik	1.58294	7.50405e-05	0.00770747
ENSMUSG00000036752	2088	Tubb4b	1.44567	7.76264e-05	0.00790771
ENSMUSG00000085912	2956	Trp53cor1	5.9524	7.87429e-05	0.00795623
ENSMUSG00000039187	5766	Fanci	4.31144	8.38306e-05	0.00828551
ENSMUSG00000026779	5777	Mastl	3.41177	8.3976e-05	0.00828551
ENSMUSG00000040722	3190	Scamp5	1.42803	8.40018e-05	0.00828551
ENSMUSG00000072949	1559	Acot1	-2.39672	8.87591e-05	0.00866995
ENSMUSG00000072980	1778	Oip5	4.33211	8.94044e-05	0.00866995
ENSMUSG00000027959	4241	Sass6	2.18733	8.99922e-05	0.00866995
ENSMUSG00000057933	1177	Gsta2	1.53788	9.11564e-05	0.00871455
ENSMUSG00000078521	1275	Aunip	5.87294	9.20325e-05	0.00873115
ENSMUSG00000021226	2196	Acot2	-2.94777	9.41894e-05	0.00886807
ENSMUSG00000092920	285	Gm10872	3.3163	9.58602e-05	0.00895752
ENSMUSG00000059939	3695	9430015G10Rik	1.37062	9.84444e-05	0.00913036
ENSMUSG00000074183	956	Gsta1	3.7136	9.99419e-05	0.0091947
ENSMUSG00000034918	4129	Cdhr2	3.58577	0.000101301	0.0091947
ENSMUSG00000027068	4281	Dhrs9	2.65396	0.000101738	0.0091947
ENSMUSG00000024747	2066	Aldh1a7	1.31311	0.000102098	0.0091947
ENSMUSG00000036928	5733	Stag3	3.47307	0.000103372	0.00924246
ENSMUSG00000024989	2778	Cep55	3.7501	0.000105333	0.00935054
ENSMUSG00000046179	5443	E2f8	-1.90553	0.000112191	0.00988869
ENSMUSG00000004446	3550	Bid	-2.02919	0.000112989	0.00988896
ENSMUSG00000022034	4010	Esco2	4.71564	0.000116145	0.010094
ENSMUSG00000069910	3460	Spdl1	4.0981	0.000117928	0.0101779
ENSMUSG00000100277	3018	RP24-260I8.2	4.07279	0.000122478	0.0104977
ENSMUSG00000019767	3792	Ccdc170	5.41452	0.000123933	0.0105495
ENSMUSG00000026622	4516	Nek2	2.58517	0.000125934	0.010647
ENSMUSG00000008153	4968	Clstn3	1.72176	0.000129998	0.0109163
ENSMUSG00000031617	2723	Tmem184c	1.50379	0.000149015	0.0123973
ENSMUSG00000043445	1027	Pgp	-2.37391	0.000150582	0.0123973
ENSMUSG00000035365	3594	Parpbp	4.58891	0.000150982	0.0123973
ENSMUSG00000047534	7990	Mis18bp1	2.96544	0.000151625	0.0123973
ENSMUSG00000030677	2063	Kif22	2.71483	0.000153622	0.0124101
ENSMUSG00000024135	3530	Srbd1	1.22648	0.000153778	0.0124101
ENSMUSG00000027663	8088	Zmat3	1.42746	0.000155529	0.0124523
ENSMUSG00000042988	2408	Notum	-1.69514	0.000156305	0.0124523
ENSMUSG00000079494	983	Cml5	4.41078	0.000159439	0.0125776
ENSMUSG00000037321	5476	Tap1	1.34735	0.000159902	0.0125776
ENSMUSG00000020253	3485	Ppm1m	-1.52993	0.000162496	0.0126856
ENSMUSG00000097113	1558	Gm19705	3.19666	0.000163317	0.0126856
ENSMUSG00000037949	2599	Ano10	1.78753	0.000170533	0.0131639
ENSMUSG00000029763	12640	Exoc4	1.68943	0.000173568	0.0132309
ENSMUSG00000002297	6571	Dbf4	2.24045	0.000173704	0.0132309
ENSMUSG00000026417	4025	Pigr	-1.27592	0.000174595	0.0132309
ENSMUSG00000033871	3990	Ppargc1b	-1.34707	0.000177624	0.0133789
ENSMUSG00000005470	2338	Asf1b	3.37656	0.0001809	0.0135435
ENSMUSG00000048012	10036	Zfp473	3.45683	0.00018498	0.0137661
ENSMUSG00000017146	8533	Brca1	2.3774	0.000186378	0.0137875
ENSMUSG00000030095	3741	Tmem43	1.48392	0.000197433	0.0145189
ENSMUSG00000026785	4255	Pkn3	2.19999	0.000199762	0.0146038
ENSMUSG00000096215	561	Smim22	2.11094	0.000204187	0.01484
ENSMUSG00000040195	7822	Tmem194	1.37242	0.000207803	0.015015
ENSMUSG00000025758	5863	Plk4	2.36704	0.000215401	0.015474
ENSMUSG00000027947	3343	Il6ra	-1.40136	0.000218582	0.015568
ENSMUSG00000034303	3525	Ccdc15	2.24035	0.000219215	0.015568
ENSMUSG00000066513	839	Klk1b4	1.85267	0.000223733	0.0157986
ENSMUSG00000024863	1101	Mbl2	1.3048	0.000232681	0.0163338
ENSMUSG00000060288	1894	Ppih	2.14129	0.000233941	0.0163338
ENSMUSG00000091813	1677	Ces2h	2.95555	0.000235972	0.0163836
ENSMUSG00000002428	5931	Hltf	1.29441	0.000237704	0.0164122
ENSMUSG00000040997	2749	Abhd4	1.12625	0.000241569	0.0165868
ENSMUSG00000042195	2568	Slc35f2	4.13527	0.000247009	0.0168672
ENSMUSG00000058729	3392	Lin9	1.76755	0.000249228	0.0169257
ENSMUSG00000025358	2432	Cdk2	-1.55194	0.00025612	0.0172224
ENSMUSG00000020027	9531	Socs2	-2.14744	0.000256368	0.0172224
ENSMUSG00000035683	2972	Melk	3.52433	0.000261372	0.0174642
ENSMUSG00000027890	1707	Gstm4	1.24258	0.000277384	0.018411
ENSMUSG00000041372	3779	B4galnt3	2.17011	0.000278505	0.018411
ENSMUSG00000097426	899	Gm8941	-1.31455	0.000292388	0.0189617
ENSMUSG00000039055	2762	Eme1	3.84186	0.000293157	0.0189617
ENSMUSG00000019235	2534	Rps6kl1	2.88597	0.000293343	0.0189617
ENSMUSG00000030867	2203	Plk1	2.70825	0.000293501	0.0189617
ENSMUSG00000031371	1438	Haus7	-1.38233	0.000294546	0.0189617
ENSMUSG00000027907	511	S100a11	1.87926	0.000295991	0.0189617
ENSMUSG00000032098	2048	Treh	4.14701	0.000301014	0.0191846
ENSMUSG00000071866	3508	Ppia	-1.20747	0.000305262	0.0193561
ENSMUSG00000025969	11842	Nrp2	-1.11824	0.000309512	0.019526
ENSMUSG00000030956	6911	Fam53b	1.14496	0.000311698	0.0195646
ENSMUSG00000027459	2207	Fam110a	1.70599	0.0003147	0.0195721
ENSMUSG00000023908	2039	Pkmyt1	2.72533	0.000314969	0.0195721
ENSMUSG00000050107	2810	Gsg2	2.57049	0.000319104	0.0196848
ENSMUSG00000051811	1108	Cox6b2	2.03157	0.000319949	0.0196848
ENSMUSG00000034854	3971	Mfsd12	-1.71329	0.000325442	0.0198327
ENSMUSG00000053613	2659	Notumos	-2.14375	0.000325545	0.0198327
ENSMUSG00000028211	6475	Trp53inp1	1.82074	0.000337816	0.0204799
ENSMUSG00000032802	2820	Srxn1	1.09935	0.00034783	0.0209846
ENSMUSG00000027306	4059	Nusap1	2.94453	0.000349529	0.0209852
ENSMUSG00000081058	1020	Hist2h3c2	2.8908	0.000359522	0.021418
ENSMUSG00000045328	7813	Cenpe	3.14435	0.000360184	0.021418
ENSMUSG00000055240	7424	Zfp101	1.79891	0.000365955	0.0216576
ENSMUSG00000034457	5891	Eda2r	5.02725	0.000370373	0.0218151
ENSMUSG00000006567	6505	Atp7b	-1.72619	0.000375701	0.0220246
ENSMUSG00000022369	5481	Mtbp	2.37853	0.000379189	0.0221247
ENSMUSG00000000303	4574	Cdh1	1.13155	0.000391279	0.0226652
ENSMUSG00000019796	3418	Lrp11	1.67438	0.000392101	0.0226652
ENSMUSG00000096727	3659	Psmb9	1.20644	0.000403521	0.0232174
ENSMUSG00000046070	2111	Igfals	-1.38484	0.000411392	0.0235612
ENSMUSG00000027115	9832	Kif18a	2.96965	0.000414171	0.0236115
ENSMUSG00000028469	4667	Npr2	-1.10697	0.000430494	0.02443
ENSMUSG00000066362	538	Rps13-ps1	-5.97238	0.000434683	0.0245556
ENSMUSG00000030131	4544	Mug2	-3.3419	0.000445382	0.0250462
ENSMUSG00000038508	1852	Gdf15	4.1977	0.000456996	0.0255836
ENSMUSG00000042686	4998	Jph1	-2.63686	0.000466368	0.0258813
ENSMUSG00000061175	8367	Fnip2	-1.25214	0.000466479	0.0258813
ENSMUSG00000021115	3796	Vrk1	1.28908	0.000471095	0.0260212
ENSMUSG00000047496	8532	Rnf152	-1.45158	0.000483093	0.0265659
ENSMUSG00000026639	4365	Lamb3	1.51605	0.000490088	0.0268318
ENSMUSG00000044548	3761	Dact1	-2.20248	0.00050276	0.0274048
ENSMUSG00000029521	2247	Chek2	1.85254	0.000525386	0.0285131
ENSMUSG00000045751	6382	Mms22l	1.63696	0.00053121	0.0287038
ENSMUSG00000001870	10480	Ltbp1	-1.32803	0.000538383	0.0289524
ENSMUSG00000039298	13012	Cdk5rap2	1.39021	0.00054047	0.0289524
ENSMUSG00000028438	8014	Kif24	1.95007	0.000547785	0.0292183
ENSMUSG00000021135	1674	Slc10a1	-1.30791	0.00056107	0.0296796
ENSMUSG00000044080	694	S100a1	-1.30536	0.000561208	0.0296796
ENSMUSG00000041959	1212	S100a10	1.44945	0.000566965	0.0296913
ENSMUSG00000034192	1257	Lsm3	1.48901	0.000567082	0.0296913
ENSMUSG00000021701	2802	Plk2	2.66357	0.000568597	0.0296913
ENSMUSG00000028678	4363	Kif2c	3.04315	0.000578932	0.029937
ENSMUSG00000031971	2767	Ccsap	2.38145	0.000579916	0.029937
ENSMUSG00000015027	2585	Galns	1.2378	0.00058053	0.029937
ENSMUSG00000033170	4952	Card10	-1.00978	0.000593888	0.0304993
ENSMUSG00000021572	3632	Cep72	2.81378	0.000599671	0.0306136
ENSMUSG00000049653	1605	Spatc1	3.24528	0.000601039	0.0306136
ENSMUSG00000032409	23492	Atr	1.17645	0.000616487	0.0312723
ENSMUSG00000020897	2946	Aurkb	2.65182	0.000625624	0.0316067
ENSMUSG00000054793	2161	Cadm4	-1.31198	0.000633109	0.0317592
ENSMUSG00000031765	540	Mt1	3.65937	0.000633753	0.0317592
ENSMUSG00000036863	5495	Syde2	-1.74003	0.000657888	0.0327771
ENSMUSG00000037337	2699	Map4k1	1.87456	0.000659341	0.0327771
ENSMUSG00000032253	33312	Phip	1.08212	0.000667795	0.0330651
ENSMUSG00000035439	5278	Haus8	1.75538	0.000679069	0.0334432
ENSMUSG00000024151	5518	Msh2	-1.49972	0.000682483	0.0334432
ENSMUSG00000054612	818	Mgmt	1.30283	0.000683503	0.0334432
ENSMUSG00000021180	4406	Rps6ka5	-2.06392	0.00068626	0.0334464
ENSMUSG00000003477	1600	Inmt	-1.26687	0.000728787	0.0353803
ENSMUSG00000031379	5553	Pir	1.28389	0.000731813	0.035389
ENSMUSG00000036223	2669	Ska1	3.80057	0.000743742	0.0358265
ENSMUSG00000021185	4434	9030617O03Rik	1.14613	0.000775274	0.0372012
ENSMUSG00000029814	4344	Igf2bp3	3.05766	0.000814504	0.0389333
ENSMUSG00000042462	676	Dctpp1	-0.969649	0.000822145	0.0391236
ENSMUSG00000055184	2191	Fam72a	2.14336	0.000824781	0.0391236
ENSMUSG00000039748	5506	Exo1	3.29514	0.000840949	0.0397388
ENSMUSG00000020330	5431	Hmmr	3.19001	0.000868502	0.0408854
ENSMUSG00000016526	3178	Dyrk3	1.59642	0.000874536	0.0410141
ENSMUSG00000047166	2387	Tigd5	-1.8014	0.000877874	0.0410159
ENSMUSG00000019979	9028	Apaf1	1.55005	0.000881499	0.041031
ENSMUSG00000068037	2620	Mas1	3.06445	0.000920351	0.0426796
ENSMUSG00000022360	5683	Atad2	1.52154	0.000930898	0.0430082
ENSMUSG00000027340	7951	Slc23a2	-0.984379	0.00094463	0.043481
ENSMUSG00000044197	6786	Gpr146	-1.12325	0.000949403	0.0435394
ENSMUSG00000027160	6558	Ccdc34	1.86309	0.000987327	0.0451121
ENSMUSG00000028044	1126	Cks1b	1.511	0.00101712	0.046303
ENSMUSG00000021792	2948	Fam213a	0.977217	0.00103546	0.0469661
ENSMUSG00000074604	3659	Mgst2	2.98219	0.00104915	0.047414
ENSMUSG00000021061	12147	Sptb	-1.70349	0.0010582	0.047645
ENSMUSG00000060560	2433	Ces4a	-2.49387	0.00106193	0.047645
ENSMUSG00000039323	1847	Igfbp2	-1.11472	0.00107133	0.0477953
ENSMUSG00000039114	1766	Nrn1	-1.1497	0.00107355	0.0477953
ENSMUSG00000057596	3758	Trim30d	2.2146	0.00108061	0.0477953
ENSMUSG00000000686	3035	Abhd15	-1.24951	0.00108287	0.0477953
ENSMUSG00000021391	1101	Cenpp	2.27983	0.00108451	0.0477953
ENSMUSG00000031906	5148	Smpd3	1.37718	0.00108957	0.0478486
ENSMUSG00000063558	8690	Aox1	1.46529	0.0010975	0.0480272
ENSMUSG00000096852	1614	Cyp2d12	2.3684	0.00110533	0.0481349
ENSMUSG00000037139	6038	Myom3	2.57671	0.00110771	0.0481349
ENSMUSG00000034774	4088	Dsg1c	-1.42565	0.0011215	0.0485645
ENSMUSG00000041731	3611	Pgm5	-2.41506	0.00113481	0.0488196
ENSMUSG00000042408	7692	Zmym6	1.18578	0.00113525	0.0488196
ENSMUSG00000020328	2054	Nudcd2	0.942737	0.00114362	0.0490099
ENSMUSG00000041801	1559	Phlda3	3.96592	0.00114976	0.0490278
ENSMUSG00000001995	6365	Sipa1l2	-1.24957	0.00115265	0.0490278
ENSMUSG00000035172	3582	Plekhh3	-1.10841	0.00115587	0.0490278
ENSMUSG00000030731	3118	Syt3	-1.67806	0.0011679	0.0493696
ENSMUSG00000086043	579	Gm12473	-1.73993	0.00118678	0.0499178
ENSMUSG00000034837	2205	Gnat1	-1.50368	0.0011889	0.0499178
