# Supplementary figures and images for: Altered zinc balance in the Atp7b−/− mouse reveals a mechanism of copper toxicity in Wilson disease
Source: Royal Society of Chemistry journal article supplement (doi:10.1039/c8mt00199e), 2018-01-01

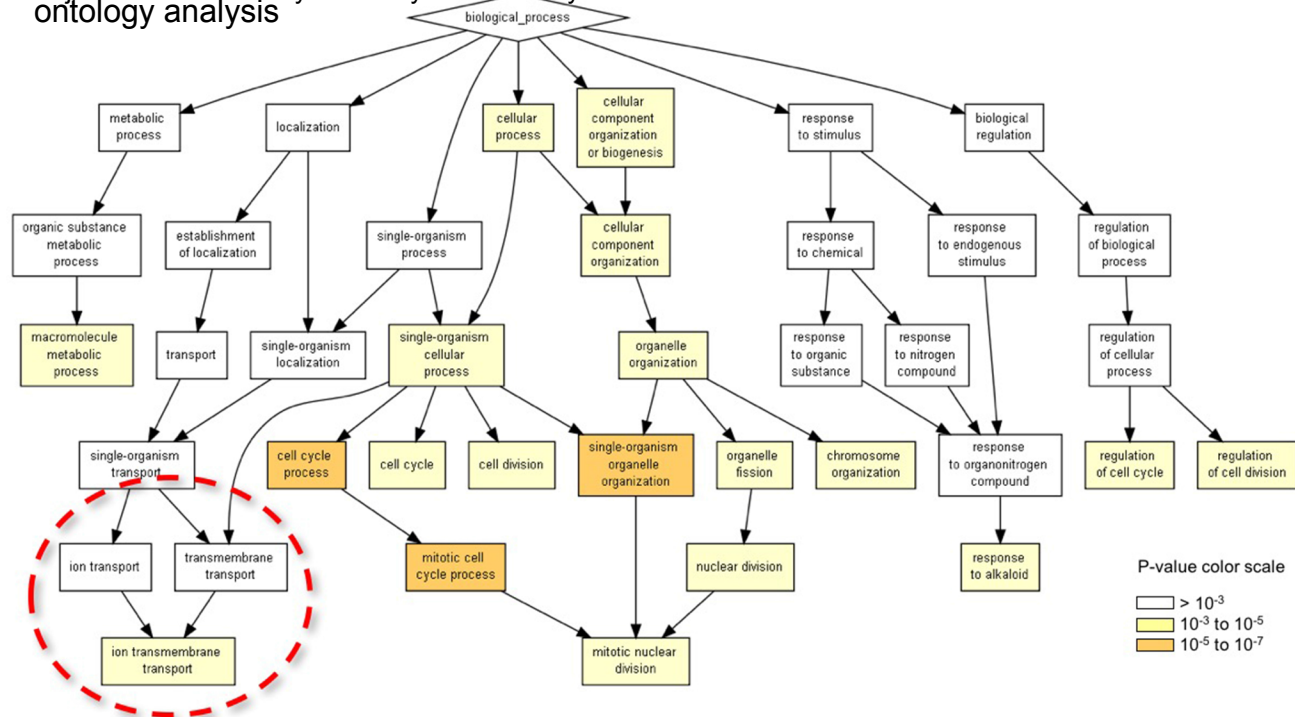

Supplement: c8mt00199e6.pdf [file c8mt00199e6.pdf]
